# Supplementary material for: The routine collection of patient-reported outcome measures (PROMs) for long-term conditions in primary care: a cohort survey
Source: PubMed Central journal article supplement — BMJ Open. 2014 Feb 21;4(2):e003968. doi: 10.1136/bmjopen-2013-003968 (PMC3931992; doi:10.1136/bmjopen-2013-003968), 2014-02-21
Supplement: bmjopen-2013-003968.draft_revisions.pdf [file bmjopen-2013-003968.draft_revisions.pdf]

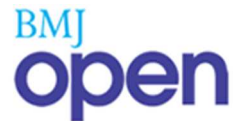

**The routine collection of patient-reported outcome measures (PROMs) for long-term conditions in primary care: a cohort survey**

|                                 |                                                                                                                                                                                                                                                                                                                                                                              |
|---------------------------------|------------------------------------------------------------------------------------------------------------------------------------------------------------------------------------------------------------------------------------------------------------------------------------------------------------------------------------------------------------------------------|
| Journal:                        | <i>BMJ Open</i>                                                                                                                                                                                                                                                                                                                                                              |
| Manuscript ID:                  | bmjopen-2013-003968                                                                                                                                                                                                                                                                                                                                                          |
| Article Type:                   | Research                                                                                                                                                                                                                                                                                                                                                                     |
| Date Submitted by the Author:   | 06-Sep-2013                                                                                                                                                                                                                                                                                                                                                                  |
| Complete List of Authors:       | Peters, Michele; University of Oxford, Nuffield Department of Population Health<br>Crocker, Helen; University of Oxford, Nuffield Department of Population Health<br>Jenkinson, Crispin; University of Oxford, Nuffield Department of Population Health<br>Doll, Helen; Oxford Outcomes,<br>Fitzpatrick, Ray; University of Oxford, Nuffield Department of Population Health |
| <b>Primary Subject Heading</b>: | Health services research                                                                                                                                                                                                                                                                                                                                                     |
| Secondary Subject Heading:      | Health policy                                                                                                                                                                                                                                                                                                                                                                |
| Keywords:                       | Patient-reported outcome measures, Long-term conditions, PRIMARY CARE, Cohort study                                                                                                                                                                                                                                                                                          |
|                                 |                                                                                                                                                                                                                                                                                                                                                                              |

SCHOLARONE™  
Manuscripts

only

## The routine collection of patient-reported outcome measures (PROMs) for long-term conditions in primary care: a cohort survey

Michele Peters<sup>1</sup>, Senior Research Scientist

Helen Crocker<sup>1</sup>, Researcher

Crispin Jenkinson<sup>1</sup>, Professor of Health Services Research

Helen Doll<sup>2</sup>, Senior Statistician

Ray Fitzpatrick<sup>1</sup>, Professor of Public Health and Primary Care

<sup>1</sup>Nuffield Department of Population Health, University of Oxford, Old Road Campus, Oxford OX3 7LF, UK

<sup>2</sup>Oxford Outcomes, Seacourt Tower, West Way, Oxford OX2 0JJ, UK

### Corresponding author

Michele Peters [michele.peters@dph.ox.ac.uk](mailto:michele.peters@dph.ox.ac.uk)

Telephone: 01865 289428

Nuffield Department of Population Health, Health Services Research Unit, University of Oxford, Old Road Campus, Oxford OX3 7LF

Keywords: Patient-reported outcome measures, long-term conditions, cohort study, primary care

Word count: 3327

**ABSTRACT**

## Objectives

To evaluate the feasibility of using patient-reported outcome measures (PROMs) for long-term conditions (LTCs) in primary care

## Design

A cohort postal survey conducted from September 2010 to April 2012

## Setting

Primary care practices (n=33) in London and the North-West of England

## Participants

4484 patients with a diagnosis of asthma, chronic obstructive pulmonary disease (COPD), diabetes, epilepsy, heart failure or stroke were sent a survey at baseline

## Main outcome measures

Response rates for the baseline and follow-up surveys, and the EQ-5D, a generic patient-reported outcome measure.

## Results

The baseline survey achieved a response rate of 38.4% (n=1721/4484) and at follow-up 71.4% (n=1136/1590). Response rates varied by LTC. Little change was found in health-related quality of life for the total sample (-0.001 for the EQ-5D score and 0.12 for the EQ-5D Visual Analogue Scale) between patients responding to both the baseline and follow-up surveys.

## Conclusions

The response rate to the baseline survey was similar to that of other general practice surveys. Current UK policy aims to assess health service performance in LTCs by means of using PROMs. It thus would be desirable to improve response rates by making the invitation to self-reports of health-related quality of life more engaging for patients. Results of the study raise questions about optimal indicators for LTCs and appropriate timelines for assessment.

**ARTICLE SUMMARY (up to 3 bullet points for each heading)****Focus**

- Long-term conditions (LTCs) reduce people's quality of life and increase the use of health care services
- The NHS Outcomes Framework aims to enhance quality of life in LTCs as assessed by patient-reported outcome measures (PROMs), in particular the EQ-5D

**Key messages**

- This survey's response rate of 38.4% at baseline was similar to response rates in other general practice surveys
- In those responding, little change was found in health-related quality of life over the course of one year
- In view of current policy in England, the response rates and limited change in health-related quality of life raises questions about the optimal indicators of care and appropriate timelines for assessment

**Strengths and limitations**

- The main strength of the study is that it is the first empirical evidence on the use of PROMs for LTCs in primary care focusing on patients with a confirmed diagnosis
- Another strength was that the study provides evidence that patients with LTCs who have completed a PROM once, are likely to complete a follow-up
- Limitations include the response rate, some logistic problems with identifying eligible patients from the GP databases and the number of patients excluded by the practices.

## INTRODUCTION

The prevalence of long-term or chronic conditions, including multi-morbidity, is increasing world-wide [1-5]. Long-term conditions (LTCs) usually reduce people's quality of life, particularly in the case of multi-morbidity [2, 3, 6]. People with limiting LTCs are the most intensive users of the most expensive health care services [2] and the majority of health expenditure is for people with chronic conditions [5].

Chronic conditions are increasingly becoming the main concern of health care systems [5, 7] and a current challenge is to evaluate models of care and to develop new models that are more cost effective [4]. The Innovative Care for Chronic Conditions (ICCC) Framework aims to address different levels of health care including that at the micro level focused on patients and families.[8] In England, improving health care outcomes for all is the primary purpose of the National Health Service (NHS) in England. [9] The NHS Outcomes Framework's [10] second domain for improvement is the enhancement of quality of life for people with LTCs as assessed by patient-reported outcome measures (PROMs).

Patients' views are complementary to those of clinicians and provide unique information into the humanity and effectiveness of health care.[11] Routinely collecting data on patients' views through PROMS provides an opportunity to help drive change in the organisation and delivery of health care. Since 2009, PROMs have been used on a routine and mandated basis to assess outcomes in four elective surgical procedures in the NHS in England (<http://www.ic.nhs.uk/proms>, accessed 21.3.13). The role of PROMs in LTCs is more challenging than in elective surgery. In elective surgery, the PROMs are used to help assess the effectiveness of a single, discrete procedure. By contrast, LTCs are complex to manage involving diverse service providers and interventions over long timelines. The purpose of this study was to assess the feasibility of using PROMs to monitor the quality of life of individuals with a range of LTCs in primary care.

## METHODS

A cohort survey was conducted in primary care from September 2010 to April 2012, with baseline and follow-up data being collected one year apart. The LTCs included were asthma, chronic obstructive pulmonary disease (COPD), diabetes, epilepsy, heart failure and stroke. Ethics approval had been obtained through the National Research Ethics (NRES) Committee of the Isle of Wight, Portsmouth & South East Hampshire (now the NRES South-Central Committee) in March 2010 and R&D approval from 20 participating Primary Care Trusts (PCTs). The study was registered on the National Institute for Health Research (NIHR) portfolio (UKCRN ID: 8462).

### Design

A cohort survey was conducted by post. The baseline survey was provided pre-packed to participating practices and was mailed by practice staff, accompanied by a covering letter from the general practitioner. The baseline survey was returned to the Oxford research team and the follow-up survey was sent from Oxford. Consent was implied by returning the baseline survey. If participants were willing to complete a follow-up questionnaire, they were asked to give consent and to provide the Oxford team with their contact details. All surveys were numbered. This served a dual purpose, firstly to identify the respondents' practice and secondly to match baseline and follow-

up responses. A 'thank you/reminder' letter was sent by the practices two weeks after the mailing of the baseline survey to all patients invited into the study. The follow-up reminder, also sent after two weeks, was sent by the research team and targeted at non-responders only. A Microsoft Access database was set up to manage the mailing and receipt of the surveys.

### Setting

The study was conducted in 33 primary care practices in London (n=18) and the North-West of England (NW) (n=15). Practices were recruited with the support of PCT staff, research nurses, local Primary Care Research Networks and the Diabetes Research Network in London. For less prevalent LTCs a larger number of practices participated. The majority of practices covered 3 LTCs and one practice covered 2 LTCs. Power calculations determined that a total of 1050 patients (or 175 per LTC) were needed to detect, at two-sided  $p < 0.05$  with 80% power, both a 15% difference in response rates between two independent groups and a moderate effect size of 0.3 in PROM score change over time. Ten practices provided patients for asthma (5 in London and 5 in NW), 16 for COPD (8 in London and 8 in NW), 10 for diabetes (5 in London and 5 in NW), 23 for epilepsy (13 in London and 10 in NW), 20 for heart failure (11 in London and 9 in NW) and 19 for stroke (12 in London and 7 in NW). Practices varied in size: 12 were small (<5800 patients), 13 medium (5800-10,500 patients) and 8 large (>10,500 patients). A slightly larger number of practices were recruited from more deprived areas (Table 1).

Table 1: Number of practices per social deprivation quintile

|                       | Quintile  | Range<br>(IMD rank 2010*) | London | NW | Total |
|-----------------------|-----------|---------------------------|--------|----|-------|
| <b>Most deprived</b>  | <b>Q1</b> | 1 – 6496                  | 4      | 4  | 8     |
|                       | <b>Q2</b> | 6497 - 12992              | 4      | 6  | 10    |
|                       | <b>Q3</b> | 12993 - 19488             | 5      | 1  | 6     |
|                       | <b>Q4</b> | 19489 - 25984             | 4      | 2  | 6     |
| <b>Least deprived</b> | <b>Q5</b> | 25985 - 32482             | 1      | 2  | 3     |

\* Indices of Multiple Deprivation 2010

### Participants

Eligible patients were identified through an automatic and remote search of practices' clinical systems by a subcontracted IT company prior to the baseline survey. The search is specific to every clinical system of which a range is available. The search was developed only for the 3 most widely used clinical systems. The aim was to identify approximately 50% of the patients for each LTC in every practice by a selection based on odd or even months of patients' birthdays. The search was based on Read codes in line with the criteria used in the Quality and Outcomes Framework (QOF) with two exceptions: patients with diabetes needed to be 18 years of age and patients with transient ischaemic attack(s) (TIAs) were excluded from the stroke group. The number of patients extracted by the search was compared to QOF estimates to check the expected numbers of patients were being selected. Patients were included in the survey for one LTC only; if they had multiple LTCs they were included for the rarest condition.

1  
2  
3 A member of staff (usually a GP or a nurse) reviewed the list of eligible patients identified from  
4 clinical systems to exclude any patients who were not considered suitable to be invited into the  
5 study (particularly if participation in the survey might cause serious distress).  
6

### 7 **Patient-reported outcome measures (PROMs)**

8  
9 A generic PROM and appropriate disease-specific PROMs were included in the surveys, as well as  
10 standard demographics questions and a question on comorbidities. The PROMs were selected on  
11 the basis of their psychometric properties evaluated by review work  
12 (<http://phi.uhce.ox.ac.uk/newpubs.php> , accessed 13.12.12) and licensing agreements. This article  
13 presents the findings from the EQ-5D [12], the generic measure used. The EQ-5D is a measure of  
14 health status primarily designed to provide a single-index value which represents the utility of  
15 specific health states, i.e. how given health states are valued by the general population.[12] It takes  
16 approximately five minutes to complete and comprises five items, one each on mobility, self-care,  
17 usual activities, pain/discomfort and anxiety/depression, that are all scored on a three-point scale. A  
18 single-index value is calculated from the five items typically with a score range from 1 (perfect  
19 health) to 0 (death) although a small number of scores below 0 can be obtained indicating states  
20 worse than death. The EQ-5D also includes a Visual Analogue Scale (VAS), ranging from 0 'worst  
21 imaginable health state' to 100 'best imaginable health state'.  
22  
23  
24  
25

### 26 **Analysis**

27  
28 Response rates were calculated overall and for each LTC at baseline and follow-up. Cross-  
29 tabulations, with chi-square tests, were used to assess differences in response rates at baseline,  
30 consent to be followed up and response rate at follow-up between categorical variables (participant  
31 LTC, gender, age, location, ethnicity), and t-tests were used to compare mean scores for continuous  
32 data (time since diagnosis, number of comorbidities). Analysis of variance was used to identify  
33 factors (type of LTC, practice or patient related-factors or mean baseline EQ-5D scores) that were  
34 significantly related to follow-up response rates. The level of significance was set at two-sided  
35  $p < 0.05$ . All the variables were entered into a logistic regression (no consent to follow-up=0 vs.  
36 consent for follow-up=1, and follow-up not completed=0 vs. follow-up completed=1). Changes in the  
37 EQ-5D utility and VAS scores for respondents to both the baseline and follow-up surveys were  
38 assessed with paired t-tests. No data imputation was performed so the number of patients in the  
39 analysis of the EQ-5D may be lower than the number of respondents to the survey.  
40  
41  
42  
43

## 44 **RESULTS**

### 45 **Recruitment of participants**

46  
47 The total number of patients extracted from each search was compared to 50% of the total QOF  
48 estimate (by LTC) based on the 2009/2010 QOF prevalence rates  
49 (<http://www.qof.ic.nhs.uk/search/>). The QOF estimates, number of patients extracted from the  
50 search, the overall difference and range of difference between the practices are presented in Table  
51 2. A positive score on the difference means that a higher number of patients than expected were  
52 extracted from the search, whereas a negative number means that a lower than expected number  
53 was extracted. Although these results give an indication of how well the searches worked, they need  
54 to be interpreted with caution. The number of patients extracted in small practices was low. The  
55  
56  
57  
58  
59  
60

extracted numbers for diabetes and stroke were expected to be lower than the number of patients in QOF. Diabetes patients aged 17 and upwards are included in QOF, whereas this study only included diabetes patients aged 18 or over. This difference is expected to be minimal. Stroke presented more of a challenge as QOF includes TIAs which were not included in this study. Therefore, it was unlikely that the numbers extracted from the search would closely match the QOF estimates.

Table 2: Numbers of eligible patients extracted in PROMs pilot search compared to QOF estimates

| LTC           | QOF estimate (n) | PROMs pilot search (n) | Difference |       | Range of difference for practices (%) |        |
|---------------|------------------|------------------------|------------|-------|---------------------------------------|--------|
|               |                  |                        | n          | %     |                                       |        |
| Asthma        | 7722             | 7615                   | -107       | -1.4  | -48.1                                 | +62.6  |
| COPD          | 2036             | 1590                   | -446       | -21.9 | -71.2                                 | +42.1  |
| Diabetes      | 5878             | 5154                   | -824       | -13.8 | -28.6                                 | +19.1  |
| Epilepsy      | 822              | 1088                   | +266       | -32.4 | -80.0                                 | +348.3 |
| Heart failure | 948              | 937                    | -11        | -1.2  | -29.4                                 | +17.7  |
| Stroke        | 2351             | 1071                   | -1280      | -54.4 | -71.2                                 | -30.0  |

### Exclusions by practices

The rates of patients excluded from being sent a questionnaire varied between LTCs and practices (Table 3). The rate of exclusions tended to be higher in the NW than in London, although this difference was small for asthma, COPD and diabetes. However, the difference was substantial for epilepsy (56.6% in NW vs. 10.0% in London), heart failure (28.5% NW vs. 12.9% London) and stroke (24.2% NW vs. 16.8% London). The reasons for excluding patients were death, blindness, co-morbidities (such as dementia or cerebral palsy) or learning difficulties, patients having moved or being on an extended holiday, not having a clear diagnosis, recently having a traumatic life event or being in a care home. Comorbidities and learning difficulties were particularly common reasons for excluding epilepsy patients.

Table 3: Exclusions of patients by practices (cohort baseline data)

| LTC (n practices)  | N patients extracted |                | N patients excluded |                | % included |                |
|--------------------|----------------------|----------------|---------------------|----------------|------------|----------------|
|                    | Total                | Practice range | Total               | Practice range | Total      | Practice range |
| Asthma (10)        | 1628                 | 64-684         | 294                 | 0-197          | 81.9       | 63.5-100.0     |
| COPD (16)          | 602                  | 8-88           | 35                  | 6-80           | 94.2       | 81.5-100.0     |
| Diabetes (10)      | 1169                 | 63-185         | 48                  | 0-13           | 95.9       | 90.2-100.0     |
| Epilepsy (23)      | 985                  | 4-260          | 460                 | 4-78           | 53.3       | 19.2-100.0     |
| Heart failure (20) | 687                  | 5-143          | 167                 | 4-81           | 75.7       | 56.6-100.0     |
| Stroke (19)        | 525                  | 4-69           | 107                 | 0-19           | 79.6       | 52.4-100.0     |

### Response rates

#### Cohort baseline

A total of 4486 questionnaires were sent and 1721 were returned achieving an overall response rate of 38.4%. The response rate varied between LTCs, with the response rate being the highest in heart



failure (50.4%, n=262) and the lowest in asthma (30.0%, n=400) (Table 4). There was significant variation in response rates between LTCs ( $p<0.001$ ), by practice ( $p=0.018$ ) and by region ( $p=0.002$ ). Additionally, across all LTCs there were significant non-linear relationships between response rates and the practices' deprivation score ( $p=0.024$ , Table 5), and the practices' EQ-5D mean score adjusted for patient age, gender, time since diagnosis and number of comorbidities ( $p=0.004$ ). Practices with a QOF score of 100 (maximum score) had significantly ( $p=0.013$ ) higher response rates (mean response rate=42.9%, SD 11.9) than those who did not (mean=35.5%, SD 14.3).

Table 4: Cohort baseline survey numbers sent and returned, and response rates (%) for each LTC (overall, by region and practice range).

| LTC (n practices)  | N    |          | Overall RR (%) | Regional RR (%) |      | RR by practice (range) (%) |
|--------------------|------|----------|----------------|-----------------|------|----------------------------|
|                    | Sent | Returned |                | London          | NW   |                            |
| Asthma (10)        | 1334 | 395      | 30.0           | 22.7            | 33.0 | 14.3-50.0                  |
| COPD (16)          | 567  | 279      | 49.2           | 43.0            | 54.3 | 32.1-66.7                  |
| Diabetes (10)      | 1121 | 448      | 40.0           | 30.5            | 50.1 | 28.1-61.3                  |
| Epilepsy (23)      | 525  | 180      | 34.0           | 35.5            | 33.6 | 0-53.9                     |
| Heart failure (20) | 520  | 262      | 50.0           | 48.8            | 51.1 | 30.6-71.4                  |
| Stroke (19)        | 418  | 152      | 36.4           | 30.0            | 44.0 | 7.7-63.2                   |

Table 5: Mean response rate by deprivation score (N refers to the number of practices for each LTC covered i.e. 97 cases)

| Deprivation quintile | N  | Mean | SD   |
|----------------------|----|------|------|
| Most deprived        | 23 | 34.2 | 13.5 |
| 2                    | 29 | 43.6 | 13.5 |
| 3                    | 18 | 39.7 | 10.2 |
| 4                    | 18 | 43.2 | 9.8  |
| Least deprived       | 9  | 48.0 | 14.1 |

#### Cohort follow-up

At baseline, 93.1% of responding patients (1603 of 1721) had agreed to be sent a follow-up questionnaire. The lowest rate of consent was achieved for heart failure (90.5%) and the highest for COPD (95.3%). Thirteen patients were excluded from follow-up as they indicated that they had not been diagnosed with the LTC referred to; the denominator for the follow-up response rate was thus 1590. For the total sample, there was no significant difference in whether consent to follow-up was given by LTC, age, region, ethnicity, number of comorbidities or time since diagnosis. There was, however, a difference between practices ( $p=0.008$ ) with the proportion of baseline respondents giving consent ranging from 78.6% to 100%. There were some disease-specific differences in consent, including gender (96.1% of men consented vs. 90.1% of women,  $p=0.029$ ) and practice (consent in asthma ranged from 79.1%-100% in 10 practices,  $p=0.010$ ) in asthma, and number of comorbidities for epilepsy (mean 1.17, SD 1.30 for those who consented vs. mean 2.14, SD 2.00 for those who did not consent,  $p=0.017$ ) and heart failure (mean 1.92, SD 1.62 for those who consented vs. mean 2.60, SD 1.71 for those who did not consent,  $p=0.049$ ) respectively.

The overall response rate of baseline respondents who consented to the follow-up was 71.4% ( $n=1136/1590$ ). Numbers of questionnaires sent and response rates by LTC are given in Table 6.

Differences in response rates to the follow-up survey were examined by means of baseline characteristics of respondents who had consented to the follow-up. For the overall sample, there were significant differences in response rate at follow-up by LTC ( $p=0.015$ ), age ( $p<0.001$ ), ethnicity ( $p=0.008$ ) and region ( $p=0.007$ ), with epilepsy and heart failure patients being less likely to respond than patients with one of the other LTCs, as were younger patients, those based in London and those from ethnic minority backgrounds (Table 7). The baseline mean EQ-5D score was significantly lower ( $p<0.001$ ) in non-responders to follow-up (mean 0.66, SD 0.33) than in follow-up responders (mean 0.73, SD 0.29). There were no significant differences in the response rate at follow-up for gender, time since diagnosis, number of comorbidities or practice.

Table 6: Cohort follow-up survey numbers sent and returned, and response rates (%) for each LTC (overall, by region and practice range).

| LTC (n practices)         | N    |          | Overall RR (%) | Regional RR (%) |      | RR by practice (range) (%) |
|---------------------------|------|----------|----------------|-----------------|------|----------------------------|
|                           | Sent | Returned |                | London          | NW   |                            |
| <b>Asthma (10)</b>        | 366  | 267      | 73.0           | 65.4            | 75.1 | 53.9-82.4                  |
| <b>COPD (16)</b>          | 262  | 187      | 71.4           | 68.9            | 73.1 | 44.4-82.9                  |
| <b>Diabetes (10)</b>      | 424  | 321      | 75.7           | 67.9            | 80.7 | 60.4-87.8                  |
| <b>Epilepsy (23)</b>      | 166  | 104      | 62.7           | 69.8            | 58.3 | 25.0-100.0                 |
| <b>Heart failure (20)</b> | 234  | 155      | 66.2           | 60.6            | 68.7 | 25.0-100.0                 |
| <b>Stroke (19)</b>        | 137  | 102      | 74.5           | 70.5            | 77.6 | 0-100.0                    |

Table 7: Factors significantly related to the number of questionnaires returned at cohort follow-up

|                                 |               | % responders |
|---------------------------------|---------------|--------------|
| <b>LTC (p=0.015)</b>            | Asthma        | 72.9         |
|                                 | COPD          | 71.4         |
|                                 | Diabetes      | 75.7         |
|                                 | Epilepsy      | 62.7         |
|                                 | Heart failure | 66.2         |
|                                 | Stroke        | 74.5         |
| <b>Age (years) (p&lt;0.001)</b> | 18-24         | 37.5         |
|                                 | 25-34         | 48.4         |
|                                 | 35-44         | 63.4         |
|                                 | 45-54         | 70.1         |
|                                 | 55-64         | 78.8         |
|                                 | 75-84         | 71.7         |
| <b>Region (p=0.007)</b>         | 85+           | 65.2         |
|                                 | London        | 67.2         |
| <b>Ethnicity (p=0.008)</b>      | North-West    | 73.7         |
|                                 | White         | 72.9         |
|                                 | Other         | 63.0         |

#### EQ-5D scores

EQ-5D scores could be calculated for 93.1% ( $n=1058$ ) of the respondents to both the baseline and follow-up surveys. The EQ-5D scores and VAS were found to be significantly different between LTCs both at baseline and follow-up (all  $p<0.001$ ). However, no significant differences were found for the mean EQ-5D scores for the total sample between baseline and follow-up. For the VAS, a significant

difference was found for heart failure only, with scores deteriorating at follow-up (mean difference -3.53, 95% CI -6.67 to -0.38). The data are presented in Table 8.

Table 8: EQ-5D and VAS mean, and change, scores at baseline and follow-up

|                          |               | Asthma       | COPD         | Diabetes     | Epilepsy     | Heart failure | Stroke      | Total        |
|--------------------------|---------------|--------------|--------------|--------------|--------------|---------------|-------------|--------------|
| <b>EQ-5D York tariff</b> |               |              |              |              |              |               |             |              |
| <b>n</b>                 |               | 255          | 177          | 301          | 95           | 137           | 93          | 1058         |
| <b>Baseline</b>          | <b>Mean</b>   | 0.83         | 0.67         | 0.73         | 0.76         | 0.64          | 0.67        | 0.73         |
|                          | <b>95% CI</b> | 0.80-0.86    | 0.63-0.71    | 0.69-0.76    | 0.71-0.82    | 0.59-0.69     | 0.61-0.74   | 0.71-0.75    |
| <b>Follow-up</b>         | <b>Mean</b>   | 0.84         | 0.67         | 0.72         | 0.76         | 0.64          | 0.67        | 0.73         |
|                          | <b>95% CI</b> | 0.81-0.87    | 0.63-0.71    | 0.69-0.76    | 0.71-0.81    | 0.59-0.69     | 0.60-0.73   | 0.71-0.75    |
| <b>Difference</b>        | <b>Mean</b>   | 0.01         | -0.002       | -0.003       | -0.001       | -0.005        | -0.008      | -0.001       |
|                          | <b>95% CI</b> | -0.004-0.015 | -0.019-0.014 | -0.013-0.008 | -0.021-0.018 | -0.022-0.013  | -0.31-0.13  | -0.007-0.045 |
| <b>p</b>                 |               | NS           | NS           | NS           | NS           | NS            | NS          | NS           |
| <b>EQ-5D VAS</b>         |               |              |              |              |              |               |             |              |
| <b>n</b>                 |               | 248          | 173          | 296          | 91           | 145           | 82          | 1035         |
| <b>Baseline</b>          | <b>Mean</b>   | 73.77        | 62.29        | 68.16        | 71.40        | 62.20         | 73.84       | 68.54        |
|                          | <b>95% CI</b> | 71.31-76.23  | 59.31-65.27  | 65.84-70.48  | 67.11-75.68  | 58.93-65.47   | 67.18-76.75 | 67.27-69.81  |
| <b>Follow-up</b>         | <b>Mean</b>   | 74.33        | 62.14        | 69.76        | 73.59        | 58.67         | 71.96       | 68.42        |
|                          | <b>95% CI</b> | 71.94-76.72  | 59.13-65.16  | 67.53-71.99  | 69.68-77.50  | 55.10-62.23   | 67.18-76.75 | 67.16-69.68  |
| <b>Difference</b>        | <b>Mean</b>   | 0.56         | -0.15        | 1.60         | 2.20         | -3.53         | -1.88       | 0.12         |
|                          | <b>95% CI</b> | -1.09-2.21   | -2.94-2.66   | -0.19-3.39   | -0.96-5.36   | -6.67-0.38    | -5.12-1.37  | -0.87-1.10   |
| <b>p</b>                 |               | NS           | NS           | NS           | NS           | 0.029         | NS          | NS           |

## DISCUSSION

This study provides the first empirical evidence on the use of PROMs for LTCs in primary care focusing on patients with a confirmed diagnosis. The evidence on participation of individuals with LTCs is essential for making decisions about the feasibility of expanding the current PROMs programme to LTCs. The aim of the study was to evaluate the feasibility of collecting PROMs data in LTCs through primary care focusing on response rates to a baseline and follow-up survey conducted one year apart. Overall, a 38.4% response rate was achieved at baseline and 71.5% for the cohort (those responding at baseline and agreeing to be sent a follow-up questionnaire) at follow-up. Response rates varied between LTCs at both assessments. Other factors significantly related to response rates were practice factors (including deprivation score, QOF score and mean EQ-5D score) at baseline, and respondent factors (including age, ethnicity, region and mean baseline EQ-5D score) at follow-up. Other methods to assess feasibility included testing the remote and automatic search of GP databases for eligible patients and to monitor patient exclusions. Problems were encountered with the search. It was possible to overcome these to some extent by the IT company amending the searches. However, discrepancies remained in the number of patients extracted from the search when compared with QOF estimates. The PROMs programme aims to be as inclusive as possible and therefore the number of patients excluded by practices at baseline was monitored. The exclusion rates varied by LTC and by region. The variation by LTC may be related to the nature of the specific

1  
2  
3 LTC or the comorbidities associated with a particular LTC. The highest exclusion rate was for  
4 epilepsy, which practices reported to be expected as many people with epilepsy have learning  
5 difficulties or other comorbidities which would make it inappropriate for them to be included in the  
6 study. There were no significant changes in EQ-5D scores between baseline and follow-up. The VAS  
7 was significantly different between baseline and follow-up for heart failure only.  
8  
9

10 The main strength of this study is the potential for greater reliability of the diagnosis obtained from  
11 GP clinical systems over the self-reported diagnoses in the GP Patient Survey [13, 14]. While the  
12 study was able to detect patients with LTC using remote and automatic search of GP databases,  
13 weaknesses of the methods tested in this study were the high exclusion rates by practices in some  
14 LTCs and the logistics of remotely identifying eligible patients from GP databases. Commonly  
15 reported reasons for exclusion were comorbidities such as learning difficulties or mental health  
16 problems. This suggests that it may not be feasible to collect PROMs data from all patients with  
17 some diagnoses; other methods, such as collecting data by proxy, may have to be considered.  
18 Furthermore, the problems found in identifying eligible patients from the practice databases means  
19 that further development work and testing would be necessary to ensure that such a system was  
20 feasible and able to be used across all clinical systems.  
21  
22  
23

24 Response rates were the main variable of interest of this study, and it would be desirable for  
25 response rates, particularly those at baseline, to be higher. However, other general practice-based  
26 surveys such as the GP Patient Survey have achieved a similar response rate [13, 14], suggesting that  
27 such a low response rate would be typical. The advantage of this study is that the potential for  
28 greater reliability of the diagnosis obtained from GP clinical systems over the self-reported diagnoses  
29 in the GP Patient Survey. The response rates for the data collection of the four elective PROMs were  
30 higher (60.3%) than the baseline response rates reported here, as were the response rates post-  
31 surgery (87.5%) [15]. Overall response rates to health surveys are decreasing [16], but the  
32 magnitude of response rates are not always thought to be a problem. Roland and colleagues found  
33 little evidence that low response rates and non-response bias in health surveys led to unfairness in  
34 payments for performance in general practices [13]. It is not known whether there is any non-  
35 response bias in this study, and efforts to enhance response rates should not be dismissed.  
36 Traditional methods to increase response rates include a good cover letter and sending a reminder.  
37 More modern methods, however, such as using electronic surveys may help increase response rates,  
38 especially in younger age groups. In this respect, it is worth noting that the response rate at follow-  
39 up of 71.5% suggests that once patients are 'on-board' the study they are likely to continue to  
40 respond, even one year later.  
41  
42  
43  
44  
45

46 The other variables of interest in this study were the EQ-5D mean and VAS scores reported by the  
47 survey respondents, with very little change occurring in health-related quality of life. In view of the  
48 goal of the current policy in England to assess performance of the health service by means of the EQ-  
49 5D, these results raise broader questions about optimal indicators of care for long-term conditions  
50 and appropriate timelines for assessment. Currently there are a number of major uncertainties  
51 regarding trends and timelines for the progression of LTCs. Moreover, given evidence from this study  
52 that better baseline EQ-5D scores resulted in higher response rates at follow-up, it is unclear how  
53 helpful self-reported health-related quality of life is in monitoring such trends.  
54  
55  
56  
57  
58  
59  
60

1  
2  
3 To improve response rates, the invitation to contribute self-reports of health needs to be more  
4 engaging in the sense of patients perceiving that their reports will actually serve a purpose. This  
5 greater sense of point or purpose could be achieved in three distinct, but not mutually exclusive  
6 ways. Firstly, patients could find the information valuable and informative, for example by providing  
7 feedback of their progress over time or in comparison with other patients. Secondly, patients could  
8 find the information in PROMs helpful in preparing for consultations with healthcare providers or as  
9 a part of regular review or assessment. Thirdly, it is conceivable that patients would value providing  
10 information if it were truly the case that PROMs data were used to provide evidence of quality or  
11 performance of services. The NHS and indeed all other healthcare systems are a long way from being  
12 able to support any of these possible uses of PROMs for long-term conditions that might enhance  
13 patient engagement. Further research needs to address whether PROMs can better inform patients  
14 about their progress, support communication of need or facilitate contributions to quality  
15 assessment.  
16  
17  
18  
19  
20  
21  
22  
23  
24  
25  
26  
27  
28  
29  
30  
31  
32  
33  
34  
35  
36  
37  
38  
39  
40  
41  
42  
43  
44  
45  
46  
47  
48  
49  
50  
51  
52  
53  
54  
55  
56  
57  
58  
59  
60

### Acknowledgments

We would like to thank the Primary Care Research Networks in London and the North-West; the Diabetes Research Network in London; all the practice staff who helped with the recruitment of practices and patients, and all the patients who participated in the surveys. Furthermore, we would like to thank Mrs Sarah Dummett for her support in collecting the data.

### Competing interest declaration

All authors have completed the Unified Competing Interest form at [www.icmje.org/coi\\_disclosure.pdf](http://www.icmje.org/coi_disclosure.pdf) (available on request from the corresponding author) and declare that (1) All authors have support from the Department of Health (England) for the submitted work; (2) none of the authors have a relationships with commercial companies that might have an interest in the submitted work in the previous 3 years; (3) their spouses, partners, or children have no relationships that may be relevant to the work; and (4) none of the authors have non-financial interests that may be relevant to the submitted work.

### Details of contributions

RF, CJ, and HD conceived and designed the study. MP and HC collected data. All authors contributed to the data analysis. MP wrote the article, with contributions from HC, HD, CJ and RF. All authors had access to the data in the study, and can take responsibility for the integrity of the data and the accuracy of the data analysis. All authors edited and approved the final version of the manuscript.

### Funding and sponsor

This research was initially funded as an individual project under the Department of Health's Policy Research Programme. From 2011, it was incorporated within the research programme of the Department of Health funded Policy Research Unit on Quality and Outcomes of Person Centred Care (QORU), a collaboration between the London School of Economics and Political Science (LSE) and the Universities of Kent and Oxford.

The University of Oxford Clinical Trials and Research Governance (CTRG) acted as sponsor.

### Disclaimer

This is an independent report commissioned and funded by the Policy Research Programme in the Department of Health. The views expressed are not necessarily those of the Department.

### Ethics approval

Ethics approval was given by the National Research Ethics (NRES) Committee of the Isle of Wight, Portsmouth & South East Hampshire (now the NRES South-Central Committee) in March 2010 (reference number 10/H0501/10). A change of the diabetes PROM was approved in September 2010.

1  
2  
3 For the baseline, consent was implied by completion and return of the survey. Consent to the follow-  
4 up was given by the majority of baseline participants by providing the research team with contact  
5 details as part of completing the baseline questionnaire.  
6

7  
8 Registration

9  
10 This study was registered on the National Institute for Health Research (NIHR) portfolio in June 2010  
11 (UKCRN ID: 8462).  
12  
13  
14  
15  
16  
17  
18  
19  
20  
21  
22  
23  
24  
25  
26  
27  
28  
29  
30  
31  
32  
33  
34  
35  
36  
37  
38  
39  
40  
41  
42  
43  
44  
45  
46  
47  
48  
49  
50  
51  
52  
53  
54  
55  
56  
57  
58  
59  
60

For peer review only

## REFERENCES

1. Barnett K, Mercer SW, Norbury M, Watt G, Wyke S, Guthrie B. Epidemiology of multimorbidity and implications for health care, research, and medical education: a cross-sectional study. *Lancet* 2012, **380**:37-43
2. Department of Health. Long Term Conditions Compendium of Information. Third ed. London: Department of Health, 2012.
3. Vogeli C, Shields AE, Lee TA, et al. Multiple chronic conditions: prevalence, health consequences, and implications for quality, care management, and costs. *J Gen Intern Med* 2007;**22 Suppl 3**:391-5
4. Pearson WS, Bhat-Schelbert K, Probst JC. Multiple chronic conditions and the aging of America: A challenge for primary care physicians. *Journal of Primary Care and Community Health* 2012;**3**(1):51-56
5. Anderson G, Horvath J. The growing burden of chronic disease in America. *Public Health Rep* 2004;**119**(3):263-70
6. Heyworth IT, Hazell ML, Linehan MF, Frank TL. How do common chronic conditions affect health-related quality of life? *Br J Gen Pract* 2009;**59**(568):e353-8
7. Epping-Jordan JE, Pruitt SD, Bengoa R, Wagner EH. Improving the quality of health care for chronic conditions. *Qual Saf Health Care* 2004;**13**(4):299-305
8. World Health Organization. Innovative care for chronic conditions: building blocks for action. Geneva, 2002.
9. Department of Health. Equity and Excellence: Liberating the NHS. London, 2010.
10. Department of Health. The NHS Outcomes Framework 2012/2013. London, 2011.
11. Black N, Jenkinson C. How can patients' views of their care enhance quality improvement? *BMJ* 2009;**399**:202-05
12. Rabin R, de Charro F. EQ-5D: a measure of health status from the EuroQol Group. *Ann Med* 2001;**33**(5):337-43
13. Roland M, Elliott M, Lyratzopoulos G, et al. Reliability of patient responses in pay for performance schemes: analysis of national General Practitioner Patient Survey data in England. *BMJ* 2009;**339**:b3851
14. Campbell J, Smith P, Nissen S, Bower P, Elliott M, Roland M. The GP Patient Survey for use in primary care in the National Health Service in the UK--development and psychometric characteristics. *BMC Fam Pract* 2009;**10**:57
15. Browne J, Jamieson L, Lewsey J, et al. Patient reported outcome measures (PROMs) in elective surgery. Report to the Department of Health, 2007.
16. Galea S, Tracy M. Participation rates in epidemiologic studies. *Ann Epidemiol* 2007;**17**(9):643-53



Peters et al. The routine collection of patient reported outcome measures (PROMs) for long-term conditions in primary care: a cohort survey

STROBE Statement—checklist of items that should be included in reports of observational studies

|                              | Item No | Recommendation                                                                                                                                                                                                                                                                                                                                                                                                                                                         |     |
|------------------------------|---------|------------------------------------------------------------------------------------------------------------------------------------------------------------------------------------------------------------------------------------------------------------------------------------------------------------------------------------------------------------------------------------------------------------------------------------------------------------------------|-----|
| <b>Title and abstract</b>    | 1       | (a) Indicate the study's design with a commonly used term in the title or the abstract                                                                                                                                                                                                                                                                                                                                                                                 | ✓   |
|                              |         | (b) Provide in the abstract an informative and balanced summary of what was done and what was found                                                                                                                                                                                                                                                                                                                                                                    | ✓   |
| <b>Introduction</b>          |         |                                                                                                                                                                                                                                                                                                                                                                                                                                                                        |     |
| Background/rationale         | 2       | Explain the scientific background and rationale for the investigation being reported                                                                                                                                                                                                                                                                                                                                                                                   | ✓   |
| Objectives                   | 3       | State specific objectives, including any prespecified hypotheses                                                                                                                                                                                                                                                                                                                                                                                                       | ✓   |
| <b>Methods</b>               |         |                                                                                                                                                                                                                                                                                                                                                                                                                                                                        |     |
| Study design                 | 4       | Present key elements of study design early in the paper                                                                                                                                                                                                                                                                                                                                                                                                                | ✓   |
| Setting                      | 5       | Describe the setting, locations, and relevant dates, including periods of recruitment, exposure, follow-up, and data collection                                                                                                                                                                                                                                                                                                                                        | ✓   |
| Participants                 | 6       | (a) <i>Cohort study</i> —Give the eligibility criteria, and the sources and methods of selection of participants. Describe methods of follow-up<br><i>Case-control study</i> —Give the eligibility criteria, and the sources and methods of case ascertainment and control selection. Give the rationale for the choice of cases and controls<br><i>Cross-sectional study</i> —Give the eligibility criteria, and the sources and methods of selection of participants | ✓   |
|                              |         | (b) <i>Cohort study</i> —For matched studies, give matching criteria and number of exposed and unexposed<br><i>Case-control study</i> —For matched studies, give matching criteria and the number of controls per case                                                                                                                                                                                                                                                 | N/A |
| Variables                    | 7       | Clearly define all outcomes, exposures, predictors, potential confounders, and effect modifiers. Give diagnostic criteria, if applicable                                                                                                                                                                                                                                                                                                                               | ✓   |
| Data sources/<br>measurement | 8*      | For each variable of interest, give sources of data and details of methods of assessment (measurement). Describe comparability of assessment methods if there is more than one group                                                                                                                                                                                                                                                                                   | ✓   |
| Bias                         | 9       | Describe any efforts to address potential sources of bias                                                                                                                                                                                                                                                                                                                                                                                                              | N/A |
| Study size                   | 10      | Explain how the study size was arrived at                                                                                                                                                                                                                                                                                                                                                                                                                              | ✓   |
| Quantitative variables       | 11      | Explain how quantitative variables were handled in the analyses. If applicable, describe which groupings were chosen and why                                                                                                                                                                                                                                                                                                                                           | ✓   |
| Statistical methods          | 12      | (a) Describe all statistical methods, including those used to control for confounding                                                                                                                                                                                                                                                                                                                                                                                  | ✓   |
|                              |         | (b) Describe any methods used to examine subgroups and interactions                                                                                                                                                                                                                                                                                                                                                                                                    | ✓   |
|                              |         | (c) Explain how missing data were addressed                                                                                                                                                                                                                                                                                                                                                                                                                            | ✓   |
|                              |         | (d) <i>Cohort study</i> —If applicable, explain how loss to follow-up was addressed<br><i>Case-control study</i> —If applicable, explain how matching of cases and controls was addressed<br><i>Cross-sectional study</i> —If applicable, describe analytical methods taking account of sampling strategy                                                                                                                                                              | ✓   |
|                              |         | (e) Describe any sensitivity analyses                                                                                                                                                                                                                                                                                                                                                                                                                                  |     |

Continued on next page

Peters et al. The routine collection of patient reported outcome measures (PROMs) for long-term conditions in primary care: a cohort survey

## Results

|                          |     |                                                                                                                                                                                                              |     |
|--------------------------|-----|--------------------------------------------------------------------------------------------------------------------------------------------------------------------------------------------------------------|-----|
| Participants             | 13* | (a) Report numbers of individuals at each stage of study—eg numbers potentially eligible, examined for eligibility, confirmed eligible, included in the study, completing follow-up, and analysed            | ✓   |
|                          |     | (b) Give reasons for non-participation at each stage                                                                                                                                                         | ✓   |
|                          |     | (c) Consider use of a flow diagram                                                                                                                                                                           |     |
| Descriptive data         | 14* | (a) Give characteristics of study participants (eg demographic, clinical, social) and information on exposures and potential confounders                                                                     | ✓   |
|                          |     | (b) Indicate number of participants with missing data for each variable of interest                                                                                                                          | ✓   |
|                          |     | (c) <i>Cohort study</i> —Summarise follow-up time (eg, average and total amount)                                                                                                                             |     |
| Outcome data             | 15* | <i>Cohort study</i> —Report numbers of outcome events or summary measures over time                                                                                                                          | ✓   |
|                          |     | <i>Case-control study</i> —Report numbers in each exposure category, or summary measures of exposure                                                                                                         |     |
|                          |     | <i>Cross-sectional study</i> —Report numbers of outcome events or summary measures                                                                                                                           |     |
| Main results             | 16  | (a) Give unadjusted estimates and, if applicable, confounder-adjusted estimates and their precision (eg, 95% confidence interval). Make clear which confounders were adjusted for and why they were included | ✓   |
|                          |     | (b) Report category boundaries when continuous variables were categorized                                                                                                                                    |     |
|                          |     | (c) If relevant, consider translating estimates of relative risk into absolute risk for a meaningful time period                                                                                             |     |
| Other analyses           | 17  | Report other analyses done—eg analyses of subgroups and interactions, and sensitivity analyses                                                                                                               | ✓   |
| <b>Discussion</b>        |     |                                                                                                                                                                                                              |     |
| Key results              | 18  | Summarise key results with reference to study objectives                                                                                                                                                     | ✓   |
| Limitations              | 19  | Discuss limitations of the study, taking into account sources of potential bias or imprecision. Discuss both direction and magnitude of any potential bias                                                   | ✓   |
| Interpretation           | 20  | Give a cautious overall interpretation of results considering objectives, limitations, multiplicity of analyses, results from similar studies, and other relevant evidence                                   | ✓   |
| Generalisability         | 21  | Discuss the generalisability (external validity) of the study results                                                                                                                                        | N/A |
| <b>Other information</b> |     |                                                                                                                                                                                                              |     |
| Funding                  | 22  | Give the source of funding and the role of the funders for the present study and, if applicable, for the original study on which the present article is based                                                | ✓   |

\*Give information separately for cases and controls in case-control studies and, if applicable, for exposed and unexposed groups in cohort and cross-sectional studies.

**Note:** An Explanation and Elaboration article discusses each checklist item and gives methodological background and published examples of transparent reporting. The STROBE checklist is best used in conjunction with this article (freely available on the Web sites of PLoS Medicine at <http://www.plosmedicine.org/>, Annals of Internal Medicine at <http://www.annals.org/>, and Epidemiology at <http://www.epidem.com/>). Information on the STROBE Initiative is available at [www.strobe-statement.org](http://www.strobe-statement.org).

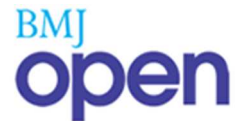

**The routine collection of patient-reported outcome measures (PROMs) for long-term conditions in primary care: a cohort survey**

|                                 |                                                                                                                                                                                                                                                                                                                                                                              |
|---------------------------------|------------------------------------------------------------------------------------------------------------------------------------------------------------------------------------------------------------------------------------------------------------------------------------------------------------------------------------------------------------------------------|
| Journal:                        | <i>BMJ Open</i>                                                                                                                                                                                                                                                                                                                                                              |
| Manuscript ID:                  | bmjopen-2013-003968.R1                                                                                                                                                                                                                                                                                                                                                       |
| Article Type:                   | Research                                                                                                                                                                                                                                                                                                                                                                     |
| Date Submitted by the Author:   | 15-Jan-2014                                                                                                                                                                                                                                                                                                                                                                  |
| Complete List of Authors:       | Peters, Michele; University of Oxford, Nuffield Department of Population Health<br>Crocker, Helen; University of Oxford, Nuffield Department of Population Health<br>Jenkinson, Crispin; University of Oxford, Nuffield Department of Population Health<br>Doll, Helen; Oxford Outcomes,<br>Fitzpatrick, Ray; University of Oxford, Nuffield Department of Population Health |
| <b>Primary Subject Heading</b>: | Health services research                                                                                                                                                                                                                                                                                                                                                     |
| Secondary Subject Heading:      | Health policy                                                                                                                                                                                                                                                                                                                                                                |
| Keywords:                       | Patient-reported outcome measures, Long-term conditions, PRIMARY CARE, Cohort study                                                                                                                                                                                                                                                                                          |
|                                 |                                                                                                                                                                                                                                                                                                                                                                              |

SCHOLARONE™  
Manuscripts

only

## The routine collection of patient-reported outcome measures (PROMs) for long-term conditions in primary care: a cohort survey

Michele Peters<sup>1</sup>, Senior Research Scientist

Helen Crocker<sup>1</sup>, Researcher

Crispin Jenkinson<sup>1</sup>, Professor of Health Services Research

Helen Doll<sup>2</sup>, Senior Statistician

Ray Fitzpatrick<sup>1</sup>, Professor of Public Health and Primary Care

<sup>1</sup>Nuffield Department of Population Health, University of Oxford, Old Road Campus, Oxford OX3 7LF, UK

<sup>2</sup>Oxford Outcomes, Seacourt Tower, West Way, Oxford OX2 0JJ, UK

### Corresponding author

Michele Peters [michele.peters@dph.ox.ac.uk](mailto:michele.peters@dph.ox.ac.uk)

Telephone: 01865 289428

Nuffield Department of Population Health, Health Services Research Unit, University of Oxford, Old Road Campus, Oxford OX3 7LF

Keywords: Patient-reported outcome measures, long-term conditions, cohort study, primary care

Word count: 3327

**ABSTRACT**

## Objectives

To evaluate the feasibility of using patient-reported outcome measures (PROMs) for long-term conditions (LTCs) in primary care

## Design

A cohort postal survey conducted from September 2010 to April 2012

## Setting

Primary care practices (n=33) in London and the North-West of England

## Participants

4484 patients with a diagnosis of asthma, chronic obstructive pulmonary disease (COPD), diabetes, epilepsy, heart failure or stroke were sent a survey at baseline

## Main outcome

The main outcome was to evaluate the feasibility of and the recruitment strategies for collecting PROMs data in LTCs by assessing the response rates for the baseline and follow-up surveys.

Secondary outcomes were the evaluation of change scores of the EQ-5D index and visual analogue scale (VAS) between baseline and follow-up surveys

## Results

The baseline survey achieved a response rate of 38.4% (n=1721/4485) and at follow-up 71.5% (n=1136/1589). Response rates varied by LTC. Little change was found in health-related quality of life for the total sample (-0.001 for the EQ-5D index score and 0.12 for the EQ-5D VAS) between patients responding to both the baseline and follow-up surveys.

## Conclusions

The response rate to the baseline survey was similar to that of other general practice surveys. Current UK policy aims to assess health service performance in LTCs by means of using PROMs. It thus would be desirable to improve response rates by making the invitation to self-reports of health-related quality of life more engaging for patients. Results on the EQ-5D score raise questions about optimal indicators for LTCs and appropriate timelines for assessment.

**ARTICLE SUMMARY****Focus**

- Long-term conditions (LTCs) reduce people's quality of life and increase the use of health care services
- The NHS Outcomes Framework aims to enhance quality of life in LTCs as assessed by patient-reported outcome measures (PROMs), in particular the EQ-5D

**Key messages**

- This survey's response rate of 38.4% at baseline was similar to response rates in other general practice surveys
- In those responding, little change was found in health-related quality of life over the course of one year
- In view of current policy in England, the response rates and limited change in health-related quality of life raises questions about the optimal indicators of care and appropriate timelines for assessment

**Strengths and limitations**

- The main strength of the study is that it is the first empirical evidence on the use of PROMs for LTCs in primary care focusing on patients with a confirmed diagnosis
- Another strength is that the study provides evidence that patients with LTCs who have completed a PROM once, are likely to complete a follow-up
- Limitations include the response rate, some logistic problems with identifying eligible patients from the GP databases and the number of patients excluded by the practices.

## INTRODUCTION

The prevalence of long-term or chronic conditions, including multi-morbidity, is increasing world-wide [1-5]. Long-term conditions (LTCs) usually reduce people's quality of life, particularly in the case of multi-morbidity [2, 3, 6]. People with limiting LTCs are the most intensive users of the most expensive health care services [2] and the majority of health expenditure is for people with chronic conditions [5].

Chronic conditions are increasingly becoming the main concern of health care systems [5, 7] and a current challenge is to evaluate models of care and to develop new models that are more cost effective [4]. The Innovative Care for Chronic Conditions (ICCC) Framework aims to address different levels of health care including that at the micro level focused on patients and families.[8] In England, improving health care outcomes for all is the primary purpose of the National Health Service (NHS) in England [9] and the NHS Outcomes Framework [10] sets out the indicators for measuring health outcomes in NHS services. The Outcomes Framework's second domain for improvement is the enhancement of quality of life for people with LTCs as assessed by patient-reported outcome measures (PROMs).

Patients' views are complementary to those of clinicians and provide unique information into the humanity and effectiveness of health care.[11] Routinely collecting data on patients' views through PROMS provides an opportunity to help drive change in the organisation and delivery of health care. Since 2009, PROMs have been used on a routine and mandated basis to assess outcomes in four elective surgical procedures in the NHS in England (<http://www.ic.nhs.uk/proms>, accessed 21.3.13). The role of PROMs in LTCs is more challenging than in elective surgery. In elective surgery, the PROMs are used to help assess the effectiveness of a single, discrete procedure. By contrast, LTCs are complex to manage involving diverse service providers and interventions over long timelines. The purpose of this study was to assess the feasibility of using PROMs to monitor aggregated quality of life data for a range of LTCs in primary care.

## METHODS

A cohort survey was conducted in primary care from September 2010 to April 2012, with baseline and follow-up data being collected one year apart. The primary aim of the study was to evaluate the recruitment strategies for and the feasibility of collecting PROMs data in LTCs by assessing response rates at two points of data collection. Secondary outcomes were the change scores of the EQ-5D index and visual analogue scale (VAS) between baseline and follow-up surveys. Two considerations informed the secondary outcomes of the study: on the one hand the NHS Outcomes Framework's [12] second domain refers to the possibility of changes over time in the quality of life in LTCs and on the other hand, the trajectory of many LTCs is deterioration in health status. The LTCs included were asthma, chronic obstructive pulmonary disease (COPD), diabetes, epilepsy, heart failure and stroke. Ethics approval had been obtained through the National Research Ethics (NRES) Committee of the Isle of Wight, Portsmouth & South East Hampshire (now the NRES South-Central Committee) in March 2010 and R&D approval from 20 participating Primary Care Trusts (PCTs). The study was registered on the National Institute for Health Research (NIHR) portfolio (UKCRN ID: 8462).

### Design

A cohort survey was conducted by post. The baseline survey was provided pre-packed to participating practices and was mailed by practice staff, accompanied by a covering letter from the general practitioner. The baseline survey was returned to the Oxford research team and the follow-up survey was sent from Oxford. Consent was implied by returning the baseline survey. If participants were willing to complete a follow-up questionnaire, they were asked to give consent and to provide the Oxford team with their contact details. All surveys were numbered. This served a dual purpose, firstly to identify the respondents' practice and secondly to match baseline and follow-up responses. A 'thank you/reminder' letter was sent by the practices two weeks after the mailing of the baseline survey to all patients invited into the study. The follow-up reminder, also sent after two weeks, was sent by the research team and targeted at non-responders only. A Microsoft Access database was set up to manage the mailing and receipt of the surveys.

### Setting

The study was conducted in 33 primary care practices in London (n=18) and the North-West of England (NW) (n=15). Practices were recruited with the support of PCT staff, research nurses, local Primary Care Research Networks and the Diabetes Research Network in London. For less prevalent LTCs a larger number of practices participated. The majority of practices covered 3 LTCs and one practice covered 2 LTCs. Power calculations determined that a total of 1050 patients (or 175 per LTC) were needed to detect, at two-sided  $p < 0.05$  with 80% power, both a 15% difference in response rates between two independent groups and a moderate effect size of 0.3 in PROM score change over time. Ten practices provided patients for asthma (5 in London and 5 in NW), 16 for COPD (8 in London and 8 in NW), 10 for diabetes (5 in London and 5 in NW), 23 for epilepsy (13 in London and 10 in NW), 20 for heart failure (11 in London and 9 in NW) and 19 for stroke (12 in London and 7 in NW). The number of practices per LTC varied due to the prevalence of the LTC and practice size. Practices varied in size: 12 were small (<5800 patients), 13 medium (5800-10,500 patients) and 8 large (>10,500 patients). A slightly larger number of practices were recruited from more deprived areas (Table 1).

Table 1: Number of practices per social deprivation quintile

|                       | Quintile  | Range<br>(IMD rank 2010*) | London | NW | Total |
|-----------------------|-----------|---------------------------|--------|----|-------|
| <b>Most deprived</b>  | <b>Q1</b> | 1 – 6496                  | 4      | 4  | 8     |
|                       | <b>Q2</b> | 6497 - 12992              | 4      | 6  | 10    |
|                       | <b>Q3</b> | 12993 - 19488             | 5      | 1  | 6     |
|                       | <b>Q4</b> | 19489 - 25984             | 4      | 2  | 6     |
| <b>Least deprived</b> | <b>Q5</b> | 25985 - 32482             | 1      | 2  | 3     |

\* Indices of Multiple Deprivation 2010

### Participants

Eligible patients were identified through an automatic and remote search of practices' clinical systems by a subcontracted IT company prior to the baseline survey. The search is specific to every clinical system of which a range is available. The search was developed only for the 3 most widely used clinical systems. The aim was to identify approximately 50% of the patients for each LTC in every practice by a selection based on odd or even months of patients' birthdays. The search was based on Read codes in line with the criteria used in the Quality and Outcomes Framework (QOF)



1  
2  
3 with two exceptions: patients with diabetes needed to be 18 years of age and patients with transient  
4 ischaemic attack(s) (TIAs) were excluded from the stroke group. The number of patients extracted by  
5 the search was compared to QOF estimates to check the expected numbers of patients were being  
6 selected. Patients were included in the survey for one LTC only; if they had multiple LTCs they were  
7 included for the rarest condition.  
8  
9

10 A member of staff (usually a GP or a nurse) reviewed the list of eligible patients identified from  
11 clinical systems to exclude any patients who were not considered suitable to be invited into the  
12 study. The instruction to practices was to exclude patients if participation in the survey might cause  
13 serious distress. The practice staff made the judgement of when this criterion applied.  
14

### 15 **Patient-reported outcome measures (PROMs)**

16  
17 A generic PROM and appropriate disease-specific PROMs were included in the surveys, as well as  
18 standard demographics questions and a question on comorbidities. The PROMs were selected on  
19 the basis of their psychometric properties evaluated by review work  
20 (<http://phi.uhce.ox.ac.uk/newpubs.php>, accessed 13.12.12) and licensing agreements. This article  
21 presents the findings from the EQ-5D [13], the generic measure used. The EQ-5D is a measure of  
22 health status primarily designed to provide a single-index value which represents the utility of  
23 specific health states, i.e. how given health states are valued by the general population.[13] It takes  
24 approximately five minutes to complete and comprises five items, one each on mobility, self-care,  
25 usual activities, pain/discomfort and anxiety/depression, that are all scored on a three-point scale. A  
26 single-index value is calculated from the five items typically with a score range from 1 (perfect  
27 health) to 0 (death) although a small number of scores below 0 can be obtained indicating states  
28 worse than death. The EQ-5D also includes a Visual Analogue Scale (VAS), ranging from 0 'worst  
29 imaginable health state' to 100 'best imaginable health state'.  
30  
31  
32  
33  
34

### 35 **Analysis**

36  
37 Response rates were calculated overall and for each LTC at baseline and follow-up. Cross-  
38 tabulations, with chi-square tests, were used to assess differences in response rates at baseline,  
39 consent to be followed up and response rate at follow-up between categorical variables (participant  
40 LTC, gender, age, location, ethnicity), and t-tests were used to compare mean scores for continuous  
41 data (time since diagnosis, number of comorbidities). Analysis of variance was used to identify  
42 factors (type of LTC, practice or patient related-factors or mean baseline EQ-5D scores) that were  
43 significantly related to follow-up response rates. All the variables relevant to cohort follow-up  
44 response rates were entered into a logistic regression (no consent to follow-up=0 vs. consent for  
45 follow-up=1, and follow-up not completed=0 vs. follow-up completed=1). The level of significance  
46 was set at two-sided  $p < 0.05$ .  
47  
48  
49

50 Changes in the EQ-5D utility and VAS scores for respondents to both the baseline and follow-up  
51 surveys were assessed with paired t-tests. No data imputation was performed so the number of  
52 patients in the analysis of the EQ-5D may be lower than the number of respondents to the survey.  
53 The level of significance was set at  $p < 0.05$ .  
54

## 55 **RESULTS**

### 56 **Recruitment of participants**

The total number of patients extracted from each search was compared to 50% of the total QOF estimate (by LTC) based on the 2009/2010 QOF prevalence rates (<http://www.qof.ic.nhs.uk/search/>). The number of patients extracted by the searches is higher (total n=17,455), than those invited into the study (n=5596), as the search data was available for all LTCs for every practice but surveys were sent only to up to three LTCs per practice. The flow of the 5596 patients invited into the study is illustrated in Figure 1. The QOF estimates, number of patients extracted from the search the overall difference and range of difference between the practices are presented in Table 2. A positive score on the difference means that a higher number of patients than expected were extracted from the search, whereas a negative number means that a lower than expected number was extracted. Although these results give an indication of how well the searches worked, they need to be interpreted with caution. The number of patients extracted in small practices was low. The extracted numbers for diabetes and stroke were expected to be lower than the number of patients in QOF. Diabetes patients aged 17 and upwards are included in QOF, whereas this study only included diabetes patients aged 18 or over. This difference is expected to be minimal. Stroke presented more of a challenge as QOF includes TIAs which were not included in this study. Therefore, it was unlikely that the numbers extracted from the search would closely match the QOF estimates.

Table 2: Numbers of eligible patients extracted in PROMs pilot search compared to QOF estimates

| LTC           | QOF estimate (n) | PROMs pilot search (n) | Difference |       | Range of difference for practices (%) |        |
|---------------|------------------|------------------------|------------|-------|---------------------------------------|--------|
|               |                  |                        | n          | %     |                                       |        |
| Asthma        | 7722             | 7615                   | -107       | -1.4  | -48.1                                 | +62.6  |
| COPD          | 2036             | 1590                   | -446       | -21.9 | -71.2                                 | +42.1  |
| Diabetes      | 5878             | 5154                   | -824       | -13.8 | -28.6                                 | +19.1  |
| Epilepsy      | 822              | 1088                   | +266       | +32.4 | -80.0                                 | +348.3 |
| Heart failure | 948              | 937                    | -11        | -1.2  | -29.4                                 | +17.7  |
| Stroke        | 2351             | 1071                   | -1280      | -54.4 | -71.2                                 | -30.0  |

### Exclusions by practices

The rates of patients excluded from being sent a questionnaire varied between LTCs and practices (Table 3). The rate of exclusions tended to be higher in the NW than in London, although this difference was small for asthma, COPD and diabetes. However, the difference was substantial for epilepsy (56.6% in NW vs. 10.0% in London), heart failure (28.5% NW vs. 12.9% London) and stroke (24.2% NW vs. 16.8% London). The reasons for excluding patients were death, blindness, co-morbidities (such as dementia or cerebral palsy) or learning difficulties, patients having moved or being on an extended holiday, not having a clear diagnosis, recently having a traumatic life event or being in a care home. Comorbidities and learning difficulties were particularly common reasons for excluding epilepsy patients.

Table 3: Exclusions of patients by practices (cohort baseline data)

| LTC (n practices) | N patients extracted |                | N patients excluded |                | % included |                |
|-------------------|----------------------|----------------|---------------------|----------------|------------|----------------|
|                   | Total                | Practice range | Total               | Practice range | Total      | Practice range |
| Asthma (10)       | 1628                 | 64-684         | 294                 | 0-197          | 81.9       | 63.5-100.0     |

|                           |      |        |      |       |      |            |
|---------------------------|------|--------|------|-------|------|------------|
| <b>COPD (16)</b>          | 602  | 8-88   | 35   | 6-80  | 94.2 | 81.5-100.0 |
| <b>Diabetes (10)</b>      | 1169 | 63-185 | 48   | 0-13  | 95.9 | 90.2-100.0 |
| <b>Epilepsy (23)</b>      | 985  | 4-260  | 460  | 4-78  | 53.3 | 19.2-100.0 |
| <b>Heart failure (20)</b> | 687  | 5-143  | 167  | 4-81  | 75.7 | 56.6-100.0 |
| <b>Stroke (19)</b>        | 525  | 4-69   | 107  | 0-19  | 79.6 | 52.4-100.0 |
| <b>Total (33)</b>         | 5596 | 38-880 | 1111 | 0-261 | 80.1 | 35.5-100.0 |

## Response rates

### Cohort baseline

A total of 4485 questionnaires were sent and 1721 were returned achieving an overall response rate of 38.4%. Thirteen patients were excluded from analysis and follow-up as they reported not to have been diagnosed with the specified LTC. The response rate varied between LTCs, with the response rate being the highest in heart failure (50.4%, n=262) and the lowest in asthma (30.0%, n=400) (Table 4). There was significant variation in response rates between LTCs ( $p<0.001$ ), by practice ( $p=0.018$ ) and by region ( $p=0.002$ ). Additionally, across all LTCs there were significant non-linear relationships between response rates and the practices' deprivation score ( $p=0.024$ , Table 5), and the practices' EQ-5D mean score adjusted for patient age, gender, time since diagnosis and number of comorbidities ( $p=0.004$ ). Practices with a QOF score of 100 (maximum score) had significantly ( $p=0.013$ ) higher response rates (mean response rate=42.9%, SD 11.9) than those who did not (mean=35.5%, SD 14.3).

Table 4: Cohort baseline survey numbers sent and returned, and response rates (%) for each LTC (overall, by region and practice range).

| LTC (n practices)         | N    |          | Overall RR (%) | Regional RR (%) |      | RR by practice (range) (%) |
|---------------------------|------|----------|----------------|-----------------|------|----------------------------|
|                           | Sent | Returned |                | London          | NW   |                            |
| <b>Asthma (10)</b>        | 1334 | 400      | 30.0           | 22.7            | 33.0 | 14.3-50.0                  |
| <b>COPD (16)</b>          | 567  | 279      | 49.2           | 43.0            | 54.3 | 32.1-66.7                  |
| <b>Diabetes (10)</b>      | 1121 | 448      | 40.0           | 30.5            | 50.1 | 28.1-61.3                  |
| <b>Epilepsy (23)</b>      | 525  | 180      | 34.0           | 35.5            | 33.6 | 0-53.9                     |
| <b>Heart failure (20)</b> | 520  | 262      | 50.0           | 48.8            | 51.1 | 30.6-71.4                  |
| <b>Stroke (19)</b>        | 418  | 152      | 36.4           | 30.0            | 44.0 | 7.7-63.2                   |
| <b>TOTAL (33)</b>         | 4485 | 1721     | 38.4           | 32.7            | 42.2 | 14.2-58.9                  |

Table 5: Mean response rate by deprivation score (N refers to the number of practices for each LTC covered i.e. 98 cases)

| Deprivation quintile  | N  | Mean | SD   |
|-----------------------|----|------|------|
| <b>Most deprived</b>  | 23 | 34.2 | 13.5 |
| <b>2</b>              | 30 | 43.6 | 13.5 |
| <b>3</b>              | 18 | 39.7 | 10.2 |
| <b>4</b>              | 18 | 43.2 | 9.8  |
| <b>Least deprived</b> | 9  | 48.0 | 14.1 |

### Cohort follow-up

At baseline, 92.3% of responding patients (1589 of 1721) had agreed and were eligible to be sent a follow-up questionnaire. The lowest rate of consent was achieved for heart failure (90.5%) and the highest for COPD (95.3%). For the total sample, there was no significant difference in whether consent to follow-up was given by LTC, age, region, ethnicity, number of comorbidities or time since diagnosis. There was, however, a difference between practices ( $p=0.008$ ) with the proportion of baseline respondents giving consent ranging from 78.6% to 100%. There were some differences in consent for individual LTCs, including gender (96.1% of men consented vs. 90.1% of women,  $p=0.029$ ) and practice (consent in asthma ranged from 79.1%-100% in 10 practices,  $p=0.010$ ) in asthma, and number of comorbidities for epilepsy (mean 1.17, SD 1.30 for those who consented vs. mean 2.14, SD 2.00 for those who did not consent,  $p=0.017$ ) and heart failure (mean 1.92, SD 1.62 for those who consented vs. mean 2.60, SD 1.71 for those who did not consent,  $p=0.049$ ) respectively.

The overall response rate of baseline respondents who consented to the follow-up was 71.5% ( $n=1136/1589$ ). Numbers of questionnaires sent and response rates by LTC are given in Table 6. Differences in response rates to the follow-up survey were examined by means of baseline characteristics of respondents who had consented to the follow-up. For the overall sample, there were significant differences in response rate at follow-up by LTC ( $p=0.015$ ), age ( $p<0.001$ ), ethnicity ( $p=0.008$ ) and region ( $p=0.007$ ), with epilepsy and heart failure patients being less likely to respond than patients with one of the other LTCs, as were younger patients, those based in London and those from ethnic minority backgrounds (Table 7). The baseline mean EQ-5D score was significantly lower ( $p<0.001$ ) in non-responders to follow-up (mean 0.66, SD 0.33) than in follow-up responders (mean 0.73, SD 0.29). There were no significant differences in the response rate at follow-up for gender, time since diagnosis, number of comorbidities or practice.

Table 6: Cohort follow-up survey numbers sent and returned, and response rates (%) for each LTC (overall, by region and practice range).

| LTC (n practices)  | N    |          | Overall RR (%) | Regional RR (%) |      | RR by practice (range) (%) |
|--------------------|------|----------|----------------|-----------------|------|----------------------------|
|                    | Sent | Returned |                | London          | NW   |                            |
| Asthma (10)        | 366  | 267      | 73.0           | 65.4            | 75.1 | 53.9-82.4                  |
| COPD (16)          | 262  | 187      | 71.4           | 68.9            | 73.1 | 44.4-82.9                  |
| Diabetes (10)      | 424  | 321      | 75.7           | 67.9            | 80.7 | 60.4-87.8                  |
| Epilepsy (23)      | 166  | 104      | 62.7           | 69.8            | 58.3 | 25.0-100.0                 |
| Heart failure (20) | 234  | 155      | 66.2           | 60.6            | 68.7 | 25.0-100.0                 |
| Stroke (19)        | 137  | 102      | 74.5           | 70.5            | 77.6 | 0-100.0                    |
| Total (33)         | 1589 | 1136     | 71.4           | 67.3            | 73.7 | 53.3-66.2                  |

Table 7: Factors significantly related to the number of questionnaires returned at cohort follow-up

|                              |               | % responders |
|------------------------------|---------------|--------------|
| LTC<br>( $p=0.015$ )         | Asthma        | 73.0         |
|                              | COPD          | 71.4         |
|                              | Diabetes      | 75.7         |
|                              | Epilepsy      | 62.7         |
|                              | Heart failure | 66.2         |
|                              | Stroke        | 74.5         |
| Age (years)<br>( $p<0.001$ ) | 18-24         | 37.5         |
|                              | 25-34         | 48.4         |

|                                        |            |      |
|----------------------------------------|------------|------|
|                                        | 35-44      | 63.4 |
|                                        | 45-54      | 70.1 |
|                                        | 55-64      | 78.8 |
|                                        | 75-84      | 71.7 |
|                                        | 85+        | 65.2 |
| <b>Region</b><br>( <b>p=0.007</b> )    | London     | 67.3 |
|                                        | North-West | 73.7 |
| <b>Ethnicity</b><br>( <b>p=0.008</b> ) | White      | 72.9 |
|                                        | Other      | 63.0 |

When analyses were performed of prediction of return of the follow-up questionnaire for each of the six LTCs, significant differences were observed for some factors, including age ( $p < 0.001$ ) and ethnicity ( $p = 0.009$ ) in asthma; age ( $p = 0.012$ ) in COPD, gender ( $p = 0.032$ ) and region ( $p = 0.003$ ) in diabetes; age ( $p = 0.011$ ) in epilepsy; and ethnicity ( $p = 0.003$ ) in stroke. The direction of these differences was the same as for the overall sample (i.e. lower completion rate in younger patients and ethnic minorities), with the additional finding that in diabetes, women were less likely to complete the follow-up than men. When entered into a logistic regression (follow-up not completed = 0 vs. follow-up completed = 1), only some age groups and EQ5D remained significant (**Table 8**). Asthma and age 18-24 served as reference categories.

**Table 8: Factors related to completion of the follow-up questionnaire**

|                    |                      | <b>p</b> | <b>Odds ratio</b> |
|--------------------|----------------------|----------|-------------------|
| <b>LTC</b>         | <b>Asthma</b>        | NS       | --                |
|                    | <b>COPD</b>          | NS       | 1.07              |
|                    | <b>Diabetes</b>      | NS       | 0.80              |
|                    | <b>Epilepsy</b>      | NS       | 1.06              |
|                    | <b>Heart Failure</b> | NS       | 0.75              |
|                    | <b>Stroke</b>        | NS       | 0.66              |
| <b>Age (years)</b> | <b>18-24</b>         | <0.001   | --                |
|                    | <b>25-34</b>         | 0.001    | 0.24              |
|                    | <b>35-44</b>         | 0.005    | 0.37              |
|                    | <b>45-54</b>         | NS       | 0.71              |
|                    | <b>55-64</b>         | NS       | 1.04              |
|                    | <b>65-74</b>         | NS       | 1.68              |
|                    | <b>75-84</b>         | 0.035    | 1.70              |
|                    | <b>85+</b>           | NS       | 1.23              |
|                    | <b>Region</b>        | NS       | 1.20              |
|                    | <b>EQ5D</b>          | <0.001   | 2.11              |
|                    | <b>Ethnicity</b>     | NS       | 0.77              |
|                    | <b>Gender</b>        | NS       | 0.88              |
|                    | <b>Constant</b>      | NS       | 1.32              |

EQ-5D scores

EQ-5D scores could be calculated for 93.1% ( $n = 1058$ ) of the respondents to both the baseline and follow-up surveys. The EQ-5D scores and VAS were found to be significantly different between LTCs both at baseline and follow-up (all  $p < 0.001$ ). However, no significant differences were found for the

mean EQ-5D scores for the total sample between baseline and follow-up. For the VAS, a significant difference was found for heart failure only, with scores deteriorating at follow-up (mean difference -3.53, 95% CI -6.67 to -0.38). The data are presented in Table 9.

Table 9: EQ-5D and VAS mean, and change, scores at baseline and follow-up

|                          |               | Asthma       | COPD         | Diabetes     | Epilepsy     | Heart failure | Stroke      | Total        |
|--------------------------|---------------|--------------|--------------|--------------|--------------|---------------|-------------|--------------|
| <b>EQ-5D York tariff</b> |               |              |              |              |              |               |             |              |
| <b>n</b>                 |               | 255          | 177          | 301          | 95           | 137           | 93          | 1058         |
| <b>Baseline</b>          | <b>Mean</b>   | 0.83         | 0.67         | 0.73         | 0.76         | 0.64          | 0.67        | 0.73         |
|                          | <b>95% CI</b> | 0.80-0.86    | 0.63-0.71    | 0.69-0.76    | 0.71-0.82    | 0.59-0.69     | 0.61-0.74   | 0.71-0.75    |
| <b>Follow-up</b>         | <b>Mean</b>   | 0.84         | 0.67         | 0.72         | 0.76         | 0.64          | 0.67        | 0.73         |
|                          | <b>95% CI</b> | 0.81-0.87    | 0.63-0.71    | 0.69-0.76    | 0.71-0.81    | 0.59-0.69     | 0.60-0.73   | 0.71-0.75    |
| <b>Difference</b>        | <b>Mean</b>   | 0.01         | -0.002       | -0.003       | -0.001       | -0.005        | -0.008      | -0.001       |
|                          | <b>95% CI</b> | -0.004-0.015 | -0.019-0.014 | -0.013-0.008 | -0.021-0.018 | -0.022-0.013  | -0.31-0.13  | -0.007-0.045 |
| <b>p</b>                 |               | NS           | NS           | NS           | NS           | NS            | NS          | NS           |
| <b>EQ-5D VAS</b>         |               |              |              |              |              |               |             |              |
| <b>n</b>                 |               | 248          | 173          | 296          | 91           | 145           | 82          | 1035         |
| <b>Baseline</b>          | <b>Mean</b>   | 73.77        | 62.29        | 68.16        | 71.40        | 62.20         | 73.84       | 68.54        |
|                          | <b>95% CI</b> | 71.31-76.23  | 59.31-65.27  | 65.84-70.48  | 67.11-75.68  | 58.93-65.47   | 67.18-76.75 | 67.27-69.81  |
| <b>Follow-up</b>         | <b>Mean</b>   | 74.33        | 62.14        | 69.76        | 73.59        | 58.67         | 71.96       | 68.42        |
|                          | <b>95% CI</b> | 71.94-76.72  | 59.13-65.16  | 67.53-71.99  | 69.68-77.50  | 55.10-62.23   | 67.18-76.75 | 67.16-69.68  |
| <b>Difference</b>        | <b>Mean</b>   | 0.56         | -0.15        | 1.60         | 2.20         | -3.53         | -1.88       | 0.12         |
|                          | <b>95% CI</b> | -1.09-2.21   | -2.94-2.66   | -0.19-3.39   | -0.96-5.36   | -6.67-0.38    | -5.12-1.37  | -0.87-1.10   |
| <b>p</b>                 |               | NS           | NS           | NS           | NS           | 0.029         | NS          | NS           |

## DISCUSSION

This study provides the first empirical evidence on the use of PROMs for LTCs in primary care focusing on patients with a confirmed diagnosis. The evidence on participation of individuals with LTCs is essential for making decisions about the feasibility of expanding the current PROMs programme to LTCs. The aim of the study was to evaluate the feasibility of collecting PROMs data in LTCs through primary care focusing on response rates to a baseline and follow-up survey conducted one year apart. Overall, a 38.4% response rate was achieved at baseline and 71.5% for the cohort (those responding at baseline and agreeing to be sent a follow-up questionnaire) at follow-up. Response rates varied between LTCs at both assessments. Other factors significantly related to response rates were practice factors (including deprivation score, QOF score and mean EQ-5D score) at baseline, and respondent factors (including age, ethnicity, region and mean baseline EQ-5D score) at follow-up. Other methods to assess feasibility included testing the remote and automatic search of GP databases for eligible patients and to monitor patient exclusions. Problems were encountered with the search. It was possible to overcome these to some extent by the IT company amending the searches. However, discrepancies remained in the number of patients extracted from the search when compared with QOF estimates. The PROMs programme aims to be as inclusive as possible and therefore the number of patients excluded by practices at baseline was monitored. The exclusion

1  
2  
3 rates varied by LTC and by region. The variation by LTC may be related to the nature of the specific  
4 LTC or the comorbidities associated with a particular LTC. The highest exclusion rate was for  
5 epilepsy, which practices reported to be expected as many people with epilepsy have learning  
6 difficulties or other comorbidities which would make it inappropriate for them to be included in the  
7 study. There were no significant changes in EQ-5D scores between baseline and follow-up. The VAS  
8 was significantly different between baseline and follow-up for heart failure only.  
9

10  
11 The main strength of this study is the potential for greater reliability of the diagnosis obtained from  
12 GP clinical systems over the self-reported diagnoses in the GP Patient Survey [14, 15]. While the  
13 study was able to detect patients with LTC using remote and automatic search of GP databases,  
14 weaknesses of the methods tested in this study were the lack of information about non-responders  
15 of the baseline survey, high exclusion rates by practices in some LTCs and the logistics of remotely  
16 identifying eligible patients from GP databases. No information about non-responders had been  
17 collected as there were concerns that collecting these data was too burdensome for participating  
18 practices. However, such data would have been valuable to assess non-response bias beyond the  
19 non-response bias from the follow-up. Exclusions rates varied between practices. This was partly due  
20 to problems with identifying eligible patients in the practices where the search by the IT company  
21 was first conducted. For example, in the case of epilepsy the initial search did not include the code in  
22 relation to medication (as by QOF) and some practices chose for a member of staff to exclude  
23 ineligible patients rather than the search being re-run. Some differences in exclusions occurred due  
24 to practices' different interpretations of the instruction to exclude patients in whom invitation into  
25 the study would cause serious distress, although this is believed to only have had a minor impact.  
26 Reasons for exclusions were not recorded systematically (again to minimize the burden on  
27 practices). Practices informally reported that the most common reasons for exclusion were  
28 comorbidities such as learning difficulties or mental health problems. This suggests that it may be  
29 not be feasible to collect PROMs data from all patients with some diagnoses; other methods, such as  
30 collecting data by proxy, may have to be considered. Remotely identifying eligible patients was  
31 challenging due to mistakes made in the initial searches (search criteria for asthma and epilepsy did  
32 not meet QOF criteria) and the search working less well in some of the clinical systems used by the  
33 participating practices. These problems mean that further development work and testing would be  
34 necessary to ensure that such a system was feasible and able to be used across all clinical systems.  
35  
36  
37  
38  
39  
40  
41

42 Response rates were the main variable of interest of this study, and it would be desirable for  
43 response rates, particularly those at baseline, to be higher. However, other general practice-based  
44 surveys such as the GP Patient Survey have achieved a similar response rate [14, 15], suggesting that  
45 such a low response rate would be typical. The advantage of this study is that the potential for  
46 greater reliability of the diagnosis obtained from GP clinical systems over the self-reported diagnoses  
47 in the GP Patient Survey. The response rates for the data collection of the four elective PROMs were  
48 higher (60.3%) than the baseline response rates reported here, as were the response rates post-  
49 surgery (87.5%) [16]. Nevertheless, non-response bias has been observed in relation to outcomes in  
50 elective surgery [17]. Overall response rates to health surveys are decreasing [18], but the  
51 magnitude of response rates are not always thought to be a problem. Roland and colleagues found  
52 little evidence that low response rates and non-response bias in health surveys led to unfairness in  
53 payments for performance in general practices [14]. It is not known whether there is any non-  
54 response bias in this study, and efforts to enhance response rates should not be dismissed.  
55 Traditional methods to increase response rates include a good cover letter and sending a reminder.  
56  
57  
58  
59  
60

1  
2  
3 More modern methods, however, such as using electronic surveys may help increase response rates,  
4 especially in younger age groups. In this respect, it is worth noting that the response rate at follow-  
5 up of 71.5% suggests that once patients are 'on-board' the study they are likely to continue to  
6 respond, even one year later.  
7

8  
9 The other variables of interest in this study were the EQ-5D mean and VAS scores reported by the  
10 survey respondents, with very little change occurring in health-related quality of life. Change in the  
11 EQ-5D in LTCS has been considered in the Health Survey for England with little change shown [19],  
12 however the cross-sectional design of the Health Survey does not allow for assessment of changes  
13 within the same cohort. In view of the goal of the current policy in England to assess performance of  
14 the health service by means of the EQ-5D, these results raise broader questions about optimal  
15 indicators of care for long-term conditions and appropriate timelines for assessment. Currently there  
16 are a number of major uncertainties regarding trends and timelines for the progression of LTCs.  
17 Moreover, given evidence from this study that better baseline EQ-5D scores resulted in higher  
18 response rates at follow-up, it is unclear how helpful self-reported health-related quality of life is in  
19 monitoring such trends.  
20  
21  
22

23 To improve response rates, the invitation to contribute self-reports of health needs to be more  
24 engaging in the sense of patients perceiving that their reports will actually serve a purpose. This  
25 greater sense of point or purpose could be achieved in three distinct, but not mutually exclusive  
26 ways. Firstly, patients could find the information valuable and informative, for example by providing  
27 feedback of their progress over time or in comparison with other patients. Secondly, patients could  
28 find the information in PROMs helpful in preparing for consultations with healthcare providers or as  
29 a part of regular review or assessment. Thirdly, it is conceivable that patients would value providing  
30 information if it were truly the case that PROMs data were used to provide evidence of quality or  
31 performance of services. The NHS and indeed all other healthcare systems are a long way from being  
32 able to support any of these possible uses of PROMs for long-term conditions that might enhance  
33 patient engagement. Further research needs to address whether PROMs can better inform patients  
34 about their progress, support communication of need or facilitate contributions to quality  
35 assessment.  
36  
37  
38  
39  
40  
41  
42  
43  
44  
45  
46  
47  
48  
49  
50  
51  
52  
53  
54  
55  
56  
57  
58  
59  
60



### Acknowledgments

We would like to thank the Primary Care Research Networks in London and the North-West; the Diabetes Research Network in London; all the practice staff who helped with the recruitment of practices and patients, and all the patients who participated in the surveys. Furthermore, we would like to thank Mrs Sarah Dummett for her support in collecting the data.

### Competing interest declaration

All authors have completed the Unified Competing Interest form at [www.icmje.org/coi\\_disclosure.pdf](http://www.icmje.org/coi_disclosure.pdf) (available on request from the corresponding author) and declare that (1) All authors have support from the Department of Health (England) for the submitted work; (2) none of the authors have a relationships with commercial companies that might have an interest in the submitted work in the previous 3 years; (3) their spouses, partners, or children have no relationships that may be relevant to the work; and (4) none of the authors have non-financial interests that may be relevant to the submitted work.

### Details of contributions

RF, CJ, and HD conceived and designed the study. MP and HC collected data. All authors contributed to the data analysis. MP wrote the article, with contributions from HC, HD, CJ and RF. All authors had access to the data in the study, and can take responsibility for the integrity of the data and the accuracy of the data analysis. All authors edited and approved the final version of the manuscript.

### Funding and sponsor

This research was initially funded as an individual project under the Department of Health's Policy Research Programme. From 2011, it was incorporated within the research programme of the Department of Health funded Policy Research Unit on Quality and Outcomes of Person Centred Care (QORU), a collaboration between the London School of Economics and Political Science (LSE) and the Universities of Kent and Oxford.

The University of Oxford Clinical Trials and Research Governance (CTRG) acted as sponsor.

### Disclaimer

This is an independent report commissioned and funded by the Policy Research Programme in the Department of Health. The views expressed are not necessarily those of the Department.

### Ethics approval

Ethics approval was given by the National Research Ethics (NRES) Committee of the Isle of Wight, Portsmouth & South East Hampshire (now the NRES South-Central Committee) in March 2010 (reference number 10/H0501/10). A change of the diabetes PROM was approved in September 2010.

1  
2  
3 For the baseline, consent was implied by completion and return of the survey. Consent to the follow-  
4 up was given by the majority of baseline participants by providing the research team with contact  
5 details as part of completing the baseline questionnaire.  
6

#### 7 8 Registration

9  
10 This study was registered on the National Institute for Health Research (NIHR) portfolio in June 2010  
11 (UKCRN ID: 8462).  
12

#### 13 14 Data sharing

15 No additional patient-level data is available. The full report of the study will be made available on  
16 the website of the Policy Research Unit on Quality and Outcomes of Person Centred Care  
17 (<http://www.qoru.ac.uk/>).  
18  
19

#### 20 21 **Figure legend**

22  
23  
24 Figure 1: Recruitment and participation (n) of people with LTCs  
25  
26  
27  
28  
29  
30  
31  
32  
33  
34  
35  
36  
37  
38  
39  
40  
41  
42  
43  
44  
45  
46  
47  
48  
49  
50  
51  
52  
53  
54  
55  
56  
57  
58  
59  
60

## REFERENCES

1. Barnett K, Mercer SW, Norbury M, et al. Epidemiology of multimorbidity and implications for health care, research, and medical education: a cross-sectional study. *Lancet* 2012, **380**:37-43
2. Department of Health. Long Term Conditions Compendium of Information. Third ed. London: Department of Health, 2012.
3. Vogeli C, Shields AE, Lee TA, et al. Multiple chronic conditions: prevalence, health consequences, and implications for quality, care management, and costs. *J Gen Intern Med* 2007;**22 Suppl 3**:391-5
4. Pearson WS, Bhat-Schelbert K, Probst JC. Multiple chronic conditions and the aging of America: A challenge for primary care physicians. *Journal of Primary Care and Community Health* 2012;**3**(1):51-56
5. Anderson G, Horvath J. The growing burden of chronic disease in America. *Public Health Rep* 2004;**119**(3):263-70
6. Heyworth IT, Hazell ML, Linehan MF, et al. How do common chronic conditions affect health-related quality of life? *Br J Gen Pract* 2009;**59**(568):e353-8
7. Epping-Jordan JE, Pruitt SD, Bengoa R, et al. Improving the quality of health care for chronic conditions. *Qual Saf Health Care* 2004;**13**(4):299-305
8. World Health Organization. Innovative care for chronic conditions: building blocks for action. Geneva, 2002.
9. Department of Health. Equity and Excellence: Liberating the NHS. London, 2010.
10. Department of Health. The NHS Outcomes Framework 2012/2013. London, 2011.
11. Black N, Jenkinson C. How can patients' views of their care enhance quality improvement? *BMJ* 2009;**399**:202-05
12. Department of Health. The NHS Outcomes Framework 2011/2012. London, 2010
13. Rabin R, de Charro F. EQ-5D: a measure of health status from the EuroQol Group. *Ann Med* 2001;**33**(5):337-43
14. Roland M, Elliott M, Lyratzopoulos G, et al. Reliability of patient responses in pay for performance schemes: analysis of national General Practitioner Patient Survey data in England. *BMJ* 2009;**339**:b3851
15. Campbell J, Smith P, Nissen S, et al. The GP Patient Survey for use in primary care in the National Health Service in the UK--development and psychometric characteristics. *BMC Fam Pract* 2009;**10**:57
16. Browne J, Jamieson L, Lewsey J, et al. Patient reported outcome measures (PROMs) in elective surgery. Report to the Department of Health, 2007.
17. Hutchings H, Neuburger J, Grosse Frie K, et al. Factors associated with non-response in routine use of patient reported outcome measures after elective surgery in England. *Health and Quality of Life Outcomes* 2012, 10:34 doi:10.1186/1477-7525-10-34
18. Galea S, Tracy M. Participation rates in epidemiologic studies. *Ann Epidemiol* 2007;**17**(9):643-53
19. Department of Health. Setting Levels of Ambition for the NHS Outcomes Framework. A technical annex to support Delivering our NHS care objectives: a consultation on the draft mandate

1  
2  
3  
4  
5  
6  
7  
8  
9  
10  
11  
12  
13  
14  
15  
16  
17  
18  
19  
20  
21  
22  
23  
24  
25  
26  
27  
28  
29  
30  
31  
32  
33  
34  
35  
36  
37  
38  
39  
40  
41  
42  
43  
44  
45  
46  
47  
48  
49  
50  
51  
52  
53  
54  
55  
56  
57  
58  
59  
60

to the NHS Commissioning Board Chapter 4: Enhancing quality of life for people with long-term conditions. London, 2012

For peer review only

1  
2  
3  
4  
5  
6  
7  
8  
9  
10  
11  
12  
13  
14  
15  
16  
17  
18  
19  
20  
21  
22  
23  
24  
25  
26  
27  
28  
29  
30  
31  
32  
33  
34  
35  
36  
37  
38  
39  
40  
41  
42  
43  
44  
45  
46  
47  
48  
49  
50  
51  
52  
53  
54  
55  
56  
57  
58  
59  
60

## The routine collection of patient-reported outcome measures (PROMs) for long-term conditions in primary care: a cohort survey

Michele Peters<sup>1</sup>, Senior Research Scientist

Helen Crocker<sup>1</sup>, Researcher

Crispin Jenkinson<sup>1</sup>, Professor of Health Services Research

Helen Doll<sup>2</sup>, Senior Statistician

Ray Fitzpatrick<sup>1</sup>, Professor of Public Health and Primary Care

<sup>1</sup>Nuffield Department of Population Health, University of Oxford, Old Road Campus, Oxford OX3 7LF, UK

<sup>2</sup>Oxford Outcomes, Seacourt Tower, West Way, Oxford OX2 0JJ, UK

### Corresponding author

Michele Peters [michele.peters@dph.ox.ac.uk](mailto:michele.peters@dph.ox.ac.uk)

Telephone: 01865 289428

Nuffield Department of Population Health, Health Services Research Unit, University of Oxford, Old Road Campus, Oxford OX3 7LF

Keywords: Patient-reported outcome measures, long-term conditions, cohort study, primary care

Word count: 3327

**ABSTRACT**

## Objectives

To evaluate the feasibility of using patient-reported outcome measures (PROMs) for long-term conditions (LTCs) in primary care

## Design

A cohort postal survey conducted from September 2010 to April 2012

## Setting

Primary care practices (n=33) in London and the North-West of England

## Participants

4484 patients with a diagnosis of asthma, chronic obstructive pulmonary disease (COPD), diabetes, epilepsy, heart failure or stroke were sent a survey at baseline

## Main outcome

The main outcome was to evaluate the feasibility of and the recruitment strategies for collecting PROMs data in LTCs by assessing the response rates for the baseline and follow-up surveys.

Secondary outcomes were the evaluation of change scores of, and the EQ-5D index and visual analogue scale (VAS), a generic patient-reported outcome measure between baseline and follow-up surveys.

## Results

The baseline survey achieved a response rate of 38.4% (n=1721/44854) and at follow-up 71.54% (n=1136/158990). Response rates varied by LTC. Little change was found in health-related quality of life for the total sample (-0.001 for the EQ-5D index score and 0.12 for the EQ-5D Visual Analogue Scale VAS) between patients responding to both the baseline and follow-up surveys.

## Conclusions

The response rate to the baseline survey was similar to that of other general practice surveys. Current UK policy aims to assess health service performance in LTCs by means of using PROMs. It thus would be desirable to improve response rates by making the invitation to self-reports of health-related quality of life more engaging for patients. Results of the study on the EQ-5D score raise questions about optimal indicators for LTCs and appropriate timelines for assessment.

**ARTICLE SUMMARY****Focus**

- Long-term conditions (LTCs) reduce people's quality of life and increase the use of health care services
- The NHS Outcomes Framework aims to enhance quality of life in LTCs as assessed by patient-reported outcome measures (PROMs), in particular the EQ-5D

**Key messages**

- This survey's response rate of 38.4% at baseline was similar to response rates in other general practice surveys
- In those responding, little change was found in health-related quality of life over the course of one year
- In view of current policy in England, the response rates and limited change in health-related quality of life raises questions about the optimal indicators of care and appropriate timelines for assessment

**Strengths and limitations**

- The main strength of the study is that it is the first empirical evidence on the use of PROMs for LTCs in primary care focusing on patients with a confirmed diagnosis
- Another strength is that the study provides evidence that patients with LTCs who have completed a PROM once, are likely to complete a follow-up
- Limitations include the response rate, some logistic problems with identifying eligible patients from the GP databases and the number of patients excluded by the practices.

## INTRODUCTION

The prevalence of long-term or chronic conditions, including multi-morbidity, is increasing world-wide [1-5]. Long-term conditions (LTCs) usually reduce people's quality of life, particularly in the case of multi-morbidity [2, 3, 6]. People with limiting LTCs are the most intensive users of the most expensive health care services [2] and the majority of health expenditure is for people with chronic conditions [5].

Chronic conditions are increasingly becoming the main concern of health care systems [5, 7] and a current challenge is to evaluate models of care and to develop new models that are more cost effective [4]. The Innovative Care for Chronic Conditions (ICCC) Framework aims to address different levels of health care including that at the micro level focused on patients and families.[8] In England, improving health care outcomes for all is the primary purpose of the National Health Service (NHS) in England [9] and the NHS Outcomes Framework [10] sets out the indicators for measuring health outcomes in NHS services. The Outcomes Framework's second domain for improvement is the enhancement of quality of life for people with LTCs as assessed by patient-reported outcome measures (PROMs).

Patients' views are complementary to those of clinicians and provide unique information into the humanity and effectiveness of health care.[11] Routinely collecting data on patients' views through PROMS provides an opportunity to help drive change in the organisation and delivery of health care. Since 2009, PROMs have been used on a routine and mandated basis to assess outcomes in four elective surgical procedures in the NHS in England (<http://www.ic.nhs.uk/proms>, accessed 21.3.13). The role of PROMs in LTCs is more challenging than in elective surgery. In elective surgery, the PROMs are used to help assess the effectiveness of a single, discrete procedure. By contrast, LTCs are complex to manage involving diverse service providers and interventions over long timelines. The purpose of this study was to assess the feasibility of using PROMs to monitor ~~the aggregated~~ quality of life ~~data of individuals with~~for a range of LTCs in primary care.

## METHODS

A cohort survey was conducted in primary care from September 2010 to April 2012, with baseline and follow-up data being collected one year apart. The primary aim of the study was to evaluate the recruitment strategies for and the feasibility of collecting PROMs data in LTCs by assessing response rates at two points of data collection. Secondary outcomes were the change scores of the EQ-5D index and visual analogue scale (VAS) between baseline and follow-up surveys. Two considerations informed the secondary outcomes of the study: on the one hand the NHS Outcomes Framework's [12] second domain refers to the possibility of changes over time in the quality of life in LTCs and on the other hand, the trajectory of many LTCs is deterioration in health status. The LTCs included were asthma, chronic obstructive pulmonary disease (COPD), diabetes, epilepsy, heart failure and stroke. Ethics approval had been obtained through the National Research Ethics (NRES) Committee of the Isle of Wight, Portsmouth & South East Hampshire (now the NRES South-Central Committee) in March 2010 and R&D approval from 20 participating Primary Care Trusts (PCTs). The study was registered on the National Institute for Health Research (NIHR) portfolio (UKCRN ID: 8462).

### Design



A cohort survey was conducted by post. The baseline survey was provided pre-packed to participating practices and was mailed by practice staff, accompanied by a covering letter from the general practitioner. The baseline survey was returned to the Oxford research team and the follow-up survey was sent from Oxford. Consent was implied by returning the baseline survey. If participants were willing to complete a follow-up questionnaire, they were asked to give consent and to provide the Oxford team with their contact details. All surveys were numbered. This served a dual purpose, firstly to identify the respondents' practice and secondly to match baseline and follow-up responses. A 'thank you/reminder' letter was sent by the practices two weeks after the mailing of the baseline survey to all patients invited into the study. The follow-up reminder, also sent after two weeks, was sent by the research team and targeted at non-responders only. A Microsoft Access database was set up to manage the mailing and receipt of the surveys.

### Setting

The study was conducted in 33 primary care practices in London (n=18) and the North-West of England (NW) (n=15). Practices were recruited with the support of PCT staff, research nurses, local Primary Care Research Networks and the Diabetes Research Network in London. For less prevalent LTCs a larger number of practices participated. The majority of practices covered 3 LTCs and one practice covered 2 LTCs. Power calculations determined that a total of 1050 patients (or 175 per LTC) were needed to detect, at two-sided  $p < 0.05$  with 80% power, both a 15% difference in response rates between two independent groups and a moderate effect size of 0.3 in PROM score change over time. Ten practices provided patients for asthma (5 in London and 5 in NW), 16 for COPD (8 in London and 8 in NW), 10 for diabetes (5 in London and 5 in NW), 23 for epilepsy (13 in London and 10 in NW), 20 for heart failure (11 in London and 9 in NW) and 19 for stroke (12 in London and 7 in NW). [The number of practices per LTC varied due to the prevalence of the LTC and practice size.](#) Practices varied in size: 12 were small (<5800 patients), 13 medium (5800-10,500 patients) and 8 large (>10,500 patients). A slightly larger number of practices were recruited from more deprived areas (Table 1).

Table 1: Number of practices per social deprivation quintile

|                       | Quintile  | Range<br>(IMD rank 2010*) | London | NW | Total |
|-----------------------|-----------|---------------------------|--------|----|-------|
| <b>Most deprived</b>  | <b>Q1</b> | 1 – 6496                  | 4      | 4  | 8     |
|                       | <b>Q2</b> | 6497 - 12992              | 4      | 6  | 10    |
|                       | <b>Q3</b> | 12993 - 19488             | 5      | 1  | 6     |
|                       | <b>Q4</b> | 19489 - 25984             | 4      | 2  | 6     |
| <b>Least deprived</b> | <b>Q5</b> | 25985 - 32482             | 1      | 2  | 3     |

\* Indices of Multiple Deprivation 2010

### Participants

Eligible patients were identified through an automatic and remote search of practices' clinical systems by a subcontracted IT company prior to the baseline survey. The search is specific to every clinical system of which a range is available. The search was developed only for the 3 most widely used clinical systems. The aim was to identify approximately 50% of the patients for each LTC in every practice by a selection based on odd or even months of patients' birthdays. The search was based on Read codes in line with the criteria used in the Quality and Outcomes Framework (QOF)

with two exceptions: patients with diabetes needed to be 18 years of age and patients with transient ischaemic attack(s) (TIAs) were excluded from the stroke group. The number of patients extracted by the search was compared to QOF estimates to check the expected numbers of patients were being selected. Patients were included in the survey for one LTC only; if they had multiple LTCs they were included for the rarest condition.

A member of staff (usually a GP or a nurse) reviewed the list of eligible patients identified from clinical systems to exclude any patients who were not considered suitable to be invited into the study. The instruction to practices was to exclude patients (particularly if participation in the survey might cause serious distress. The practice staff made the judgement of when this criterion applied).

### Patient-reported outcome measures (PROMs)

A generic PROM and appropriate disease-specific PROMs were included in the surveys, as well as standard demographics questions and a question on comorbidities. The PROMs were selected on the basis of their psychometric properties evaluated by review work (<http://phi.uhce.ox.ac.uk/newpubs.php>, accessed 13.12.12) and licensing agreements. This article presents the findings from the EQ-5D [132], the generic measure used. The EQ-5D is a measure of health status primarily designed to provide a single-index value which represents the utility of specific health states, i.e. how given health states are valued by the general population.[132] It takes approximately five minutes to complete and comprises five items, one each on mobility, self-care, usual activities, pain/discomfort and anxiety/depression, that are all scored on a three-point scale. A single-index value is calculated from the five items typically with a score range from 1 (perfect health) to 0 (death) although a small number of scores below 0 can be obtained indicating states worse than death. The EQ-5D also includes a Visual Analogue Scale (VAS), ranging from 0 'worst imaginable health state' to 100 'best imaginable health state'.

### Analysis

Response rates were calculated overall and for each LTC at baseline and follow-up. Cross-tabulations, with chi-square tests, were used to assess differences in response rates at baseline, consent to be followed up and response rate at follow-up between categorical variables (participant LTC, gender, age, location, ethnicity), and t-tests were used to compare mean scores for continuous data (time since diagnosis, number of comorbidities). Analysis of variance was used to identify factors (type of LTC, practice or patient related-factors or mean baseline EQ-5D scores) that were significantly related to follow-up response rates. ~~The level of significance was set at two-sided p<0.05.~~ All the variables relevant to cohort follow-up response rates were entered into a logistic regression (no consent to follow-up=0 vs. consent for follow-up=1, and follow-up not completed=0 vs. follow-up completed=1). The level of significance was set at two-sided p<0.05.

Changes in the EQ-5D utility and VAS scores for respondents to both the baseline and follow-up surveys were assessed with paired t-tests. No data imputation was performed so the number of patients in the analysis of the EQ-5D may be lower than the number of respondents to the survey.

The level of significance was set at p<0.05.

## RESULTS

### Recruitment of participants

The total number of patients extracted from each search was compared to 50% of the total QOF estimate (by LTC) based on the 2009/2010 QOF prevalence rates (<http://www.gof.ic.nhs.uk/search/>). The number of patients extracted by the searches is higher (total n=17,455), than those invited into the study (n=5596), as the search data was available for all LTCs for every practice but surveys were sent only to up to three LTCs per practice. The flow of the 5596 patients invited into the study is illustrated in Figure 1. The QOF estimates, number of patients extracted from the search, the overall difference and range of difference between the practices are presented in Table 2. A positive score on the difference means that a higher number of patients than expected were extracted from the search, whereas a negative number means that a lower than expected number was extracted. Although these results give an indication of how well the searches worked, they need to be interpreted with caution. The number of patients extracted in small practices was low. The extracted numbers for diabetes and stroke were expected to be lower than the number of patients in QOF. Diabetes patients aged 17 and upwards are included in QOF, whereas this study only included diabetes patients aged 18 or over. This difference is expected to be minimal. Stroke presented more of a challenge as QOF includes TIAs which were not included in this study. Therefore, it was unlikely that the numbers extracted from the search would closely match the QOF estimates.

Table 2: Numbers of eligible patients extracted in PROMs pilot search compared to QOF estimates

| LTC           | QOF estimate (n) | PROMs pilot search (n) | Difference |       | Range of difference for practices (%) |        |
|---------------|------------------|------------------------|------------|-------|---------------------------------------|--------|
|               |                  |                        | n          | %     |                                       |        |
| Asthma        | 7722             | 7615                   | -107       | -1.4  | -48.1                                 | +62.6  |
| COPD          | 2036             | 1590                   | -446       | -21.9 | -71.2                                 | +42.1  |
| Diabetes      | 5878             | 5154                   | -824       | -13.8 | -28.6                                 | +19.1  |
| Epilepsy      | 822              | 1088                   | +266       | +32.4 | -80.0                                 | +348.3 |
| Heart failure | 948              | 937                    | -11        | -1.2  | -29.4                                 | +17.7  |
| Stroke        | 2351             | 1071                   | -1280      | -54.4 | -71.2                                 | -30.0  |

### Exclusions by practices

The rates of patients excluded from being sent a questionnaire varied between LTCs and practices (Table 3). The rate of exclusions tended to be higher in the NW than in London, although this difference was small for asthma, COPD and diabetes. However, the difference was substantial for epilepsy (56.6% in NW vs. 10.0% in London), heart failure (28.5% NW vs. 12.9% London) and stroke (24.2% NW vs. 16.8% London). The reasons for excluding patients were death, blindness, co-morbidities (such as dementia or cerebral palsy) or learning difficulties, patients having moved or being on an extended holiday, not having a clear diagnosis, recently having a traumatic life event or being in a care home. Comorbidities and learning difficulties were particularly common reasons for excluding epilepsy patients.

Table 3: Exclusions of patients by practices (cohort baseline data)

| LTC (n practices) | N patients extracted |                | N patients excluded |                | % included |                |
|-------------------|----------------------|----------------|---------------------|----------------|------------|----------------|
|                   | Total                | Practice range | Total               | Practice range | Total      | Practice range |
| Asthma (10)       | 1628                 | 64-684         | 294                 | 0-197          | 81.9       | 63.5-100.0     |

|                           |             |               |             |              |             |                   |
|---------------------------|-------------|---------------|-------------|--------------|-------------|-------------------|
| <b>COPD (16)</b>          | 602         | 8-88          | 35          | 6-80         | 94.2        | 81.5-100.0        |
| <b>Diabetes (10)</b>      | 1169        | 63-185        | 48          | 0-13         | 95.9        | 90.2-100.0        |
| <b>Epilepsy (23)</b>      | 985         | 4-260         | 460         | 4-78         | 53.3        | 19.2-100.0        |
| <b>Heart failure (20)</b> | 687         | 5-143         | 167         | 4-81         | 75.7        | 56.6-100.0        |
| <b>Stroke (19)</b>        | 525         | 4-69          | 107         | 0-19         | 79.6        | 52.4-100.0        |
| <b>Total (33)</b>         | <b>5596</b> | <b>38-880</b> | <b>1111</b> | <b>0-261</b> | <b>80.1</b> | <b>35.5-100.0</b> |

### Response rates

#### Cohort baseline

A total of 4485~~6~~ questionnaires were sent and 1721 were returned achieving an overall response rate of 38.4%. Thirteen patients were excluded from analysis and follow-up as they reported not to have been diagnosed with the specified LTC. The response rate varied between LTCs, with the response rate being the highest in heart failure (50.4%, n=262) and the lowest in asthma (30.0%, n=400) (Table 4). There was significant variation in response rates between LTCs ( $p<0.001$ ), by practice ( $p=0.018$ ) and by region ( $p=0.002$ ). Additionally, across all LTCs there were significant non-linear relationships between response rates and the practices' deprivation score ( $p=0.024$ , Table 5), and the practices' EQ-5D mean score adjusted for patient age, gender, time since diagnosis and number of comorbidities ( $p=0.004$ ). Practices with a QOF score of 100 (maximum score) had significantly ( $p=0.013$ ) higher response rates (mean response rate=42.9%, SD 11.9) than those who did not (mean=35.5%, SD 14.3).

Table 4: Cohort baseline survey numbers sent and returned, and response rates (%) for each LTC (overall, by region and practice range).

| LTC (n practices)         | N           |                    | Overall RR (%) | Regional RR (%) |             | RR by practice (range) (%) |
|---------------------------|-------------|--------------------|----------------|-----------------|-------------|----------------------------|
|                           | Sent        | Returned           |                | London          | NW          |                            |
| <b>Asthma (10)</b>        | 1334        | <del>395</del> 400 | 30.0           | 22.7            | 33.0        | 14.3-50.0                  |
| <b>COPD (16)</b>          | 567         | 279                | 49.2           | 43.0            | 54.3        | 32.1-66.7                  |
| <b>Diabetes (10)</b>      | 1121        | 448                | 40.0           | 30.5            | 50.1        | 28.1-61.3                  |
| <b>Epilepsy (23)</b>      | 525         | 180                | 34.0           | 35.5            | 33.6        | 0-53.9                     |
| <b>Heart failure (20)</b> | 520         | 262                | 50.0           | 48.8            | 51.1        | 30.6-71.4                  |
| <b>Stroke (19)</b>        | 418         | 152                | 36.4           | 30.0            | 44.0        | 7.7-63.2                   |
| <b>TOTAL (33)</b>         | <b>4485</b> | <b>1721</b>        | <b>38.4</b>    | <b>32.7</b>     | <b>42.2</b> | <b>14.2-58.9</b>           |

Table 5: Mean response rate by deprivation score (N refers to the number of practices for each LTC covered i.e. 987 cases)

| Deprivation quintile  | N                | Mean | SD   |
|-----------------------|------------------|------|------|
| <b>Most deprived</b>  | 23               | 34.2 | 13.5 |
| <b>2</b>              | <del>29</del> 30 | 43.6 | 13.5 |
| <b>3</b>              | 18               | 39.7 | 10.2 |
| <b>4</b>              | 18               | 43.2 | 9.8  |
| <b>Least deprived</b> | 9                | 48.0 | 14.1 |

#### Cohort follow-up

At baseline, 93.192.3% of responding patients (1603-1589 of 1721) had agreed and were eligible to be sent a follow-up questionnaire. The lowest rate of consent was achieved for heart failure (90.5%) and the highest for COPD (95.3%). ~~Thirteen patients were excluded from follow-up as they indicated that they had not been diagnosed with the LTC referred to; the denominator for the follow-up response rate was thus 1590.~~ For the total sample, there was no significant difference in whether consent to follow-up was given by LTC, age, region, ethnicity, number of comorbidities or time since diagnosis. There was, however, a difference between practices ( $p=0.008$ ) with the proportion of baseline respondents giving consent ranging from 78.6% to 100%. There were some ~~disease-specific~~ differences in consent ~~for individual LTCs~~, including gender (96.1% of men consented vs. 90.1% of women,  $p=0.029$ ) and practice (consent in asthma ranged from 79.1%-100% in 10 practices,  $p=0.010$ ) in asthma, and number of comorbidities for epilepsy (mean 1.17, SD 1.30 for those who consented vs. mean 2.14, SD 2.00 for those who did not consent,  $p=0.017$ ) and heart failure (mean 1.92, SD 1.62 for those who consented vs. mean 2.60, SD 1.71 for those who did not consent,  $p=0.049$ ) respectively.

The overall response rate of baseline respondents who consented to the follow-up was 71.54% ( $n=1136/158990$ ). Numbers of questionnaires sent and response rates by LTC are given in Table 6. Differences in response rates to the follow-up survey were examined by means of baseline characteristics of respondents who had consented to the follow-up. For the overall sample, there were significant differences in response rate at follow-up by LTC ( $p=0.015$ ), age ( $p<0.001$ ), ethnicity ( $p=0.008$ ) and region ( $p=0.007$ ), with epilepsy and heart failure patients being less likely to respond than patients with one of the other LTCs, as were younger patients, those based in London and those from ethnic minority backgrounds (Table 7). The baseline mean EQ-5D score was significantly lower ( $p<0.001$ ) in non-responders to follow-up (mean 0.66, SD 0.33) than in follow-up responders (mean 0.73, SD 0.29). There were no significant differences in the response rate at follow-up for gender, time since diagnosis, number of comorbidities or practice.

Table 6: Cohort follow-up survey numbers sent and returned, and response rates (%) for each LTC (overall, by region and practice range).

| LTC (n practices)  | N           |             | Overall RR (%) | Regional RR (%) |             | RR by practice (range) (%) |
|--------------------|-------------|-------------|----------------|-----------------|-------------|----------------------------|
|                    | Sent        | Returned    |                | London          | NW          |                            |
| Asthma (10)        | 366         | 267         | 73.0           | 65.4            | 75.1        | 53.9-82.4                  |
| COPD (16)          | 262         | 187         | 71.4           | 68.9            | 73.1        | 44.4-82.9                  |
| Diabetes (10)      | 424         | 321         | 75.7           | 67.9            | 80.7        | 60.4-87.8                  |
| Epilepsy (23)      | 166         | 104         | 62.7           | 69.8            | 58.3        | 25.0-100.0                 |
| Heart failure (20) | 234         | 155         | 66.2           | 60.6            | 68.7        | 25.0-100.0                 |
| Stroke (19)        | 137         | 102         | 74.5           | 70.5            | 77.6        | 0-100.0                    |
| <b>Total (33)</b>  | <b>1589</b> | <b>1136</b> | <b>71.4</b>    | <b>67.3</b>     | <b>73.7</b> | <b>53.3-66.2</b>           |

Table 7: Factors significantly related to the number of questionnaires returned at cohort follow-up

| LTC       |               | % responders |
|-----------|---------------|--------------|
| (p=0.015) | Asthma        | 73.0         |
|           | COPD          | 71.4         |
|           | Diabetes      | 75.7         |
|           | Epilepsy      | 62.7         |
|           | Heart failure | 66.2         |

|                                     |            |      |
|-------------------------------------|------------|------|
|                                     | Stroke     | 74.5 |
| <b>Age (years)</b><br>( $p<0.001$ ) | 18-24      | 37.5 |
|                                     | 25-34      | 48.4 |
|                                     | 35-44      | 63.4 |
|                                     | 45-54      | 70.1 |
|                                     | 55-64      | 78.8 |
|                                     | 75-84      | 71.7 |
|                                     | 85+        | 65.2 |
| <b>Region</b><br>( $p=0.007$ )      | London     | 67.3 |
|                                     | North-West | 73.7 |
| <b>Ethnicity</b><br>( $p=0.008$ )   | White      | 72.9 |
|                                     | Other      | 63.0 |

When analyses were performed of prediction of return of the follow-up questionnaire for each of the six LTCs, significant differences were observed for some factors, including age ( $p<0.001$ ) and ethnicity ( $p=0.009$ ) in asthma; age ( $p=0.012$ ) in COPD, gender ( $p=0.032$ ) and region ( $p=0.003$ ) in diabetes; age ( $p=0.011$ ) in epilepsy; and ethnicity ( $p=0.003$ ) in stroke. The direction of these differences was the same as for the overall sample (i.e. lower completion rate in younger patients and ethnic minorities), with the additional finding that in diabetes, women were less likely to complete the follow-up than men. When entered into a logistic regression (follow-up not completed =0 vs. follow-up completed =1), only some age groups and EQ5D remained significant (Table 8). Asthma and age 18-24 served as reference categories.

**Table 8: Factors related to completion of the follow-up questionnaire**

|                    |                      | <b>p</b> | <b>Odds ratio</b> |
|--------------------|----------------------|----------|-------------------|
| <b>LTC</b>         | <b>Asthma</b>        | NS       | --                |
|                    | <b>COPD</b>          | NS       | 1.07              |
|                    | <b>Diabetes</b>      | NS       | 0.80              |
|                    | <b>Epilepsy</b>      | NS       | 1.06              |
|                    | <b>Heart Failure</b> | NS       | 0.75              |
|                    | <b>Stroke</b>        | NS       | 0.66              |
| <b>Age (years)</b> | <b>18-24</b>         | $<0.001$ | --                |
|                    | <b>25-34</b>         | 0.001    | 0.24              |
|                    | <b>35-44</b>         | 0.005    | 0.37              |
|                    | <b>45-54</b>         | NS       | 0.71              |
|                    | <b>55-64</b>         | NS       | 1.04              |
|                    | <b>65-74</b>         | NS       | 1.68              |
|                    | <b>75-84</b>         | 0.035    | 1.70              |
|                    | <b>85+</b>           | NS       | 1.23              |
|                    | <b>Region</b>        | NS       | 1.20              |
|                    | <b>EQ5D</b>          | $<0.001$ | 2.11              |
|                    | <b>Ethnicity</b>     | NS       | 0.77              |
|                    | <b>Gender</b>        | NS       | 0.88              |
|                    | <b>Constant</b>      | NS       | 1.32              |

EQ-5D scores

EQ-5D scores could be calculated for 93.1% (n=1058) of the respondents to both the baseline and follow-up surveys. The EQ-5D scores and VAS were found to be significantly different between LTCs both at baseline and follow-up (all p<0.001). However, no significant differences were found for the mean EQ-5D scores for the total sample between baseline and follow-up. For the VAS, a significant difference was found for heart failure only, with scores deteriorating at follow-up (mean difference -3.53, 95% CI -6.67 to -0.38). The data are presented in Table 89.

Table 89: EQ-5D and VAS mean, and change, scores at baseline and follow-up

|                          |               | Asthma       | COPD         | Diabetes     | Epilepsy     | Heart failure | Stroke      | Total        |
|--------------------------|---------------|--------------|--------------|--------------|--------------|---------------|-------------|--------------|
| <b>EQ-5D York tariff</b> |               |              |              |              |              |               |             |              |
| <b>n</b>                 |               | 255          | 177          | 301          | 95           | 137           | 93          | 1058         |
| <b>Baseline</b>          | <b>Mean</b>   | 0.83         | 0.67         | 0.73         | 0.76         | 0.64          | 0.67        | 0.73         |
|                          | <b>95% CI</b> | 0.80-0.86    | 0.63-0.71    | 0.69-0.76    | 0.71-0.82    | 0.59-0.69     | 0.61-0.74   | 0.71-0.75    |
| <b>Follow-up</b>         | <b>Mean</b>   | 0.84         | 0.67         | 0.72         | 0.76         | 0.64          | 0.67        | 0.73         |
|                          | <b>95% CI</b> | 0.81-0.87    | 0.63-0.71    | 0.69-0.76    | 0.71-0.81    | 0.59-0.69     | 0.60-0.73   | 0.71-0.75    |
| <b>Difference</b>        | <b>Mean</b>   | 0.01         | -0.002       | -0.003       | -0.001       | -0.005        | -0.008      | -0.001       |
|                          | <b>95% CI</b> | -0.004-0.015 | -0.019-0.014 | -0.013-0.008 | -0.021-0.018 | -0.022-0.013  | -0.31-0.13  | -0.007-0.045 |
| <b>p</b>                 |               | NS           | NS           | NS           | NS           | NS            | NS          | NS           |
| <b>EQ-5D VAS</b>         |               |              |              |              |              |               |             |              |
| <b>n</b>                 |               | 248          | 173          | 296          | 91           | 145           | 82          | 1035         |
| <b>Baseline</b>          | <b>Mean</b>   | 73.77        | 62.29        | 68.16        | 71.40        | 62.20         | 73.84       | 68.54        |
|                          | <b>95% CI</b> | 71.31-76.23  | 59.31-65.27  | 65.84-70.48  | 67.11-75.68  | 58.93-65.47   | 67.18-76.75 | 67.27-69.81  |
| <b>Follow-up</b>         | <b>Mean</b>   | 74.33        | 62.14        | 69.76        | 73.59        | 58.67         | 71.96       | 68.42        |
|                          | <b>95% CI</b> | 71.94-76.72  | 59.13-65.16  | 67.53-71.99  | 69.68-77.50  | 55.10-62.23   | 67.18-76.75 | 67.16-69.68  |
| <b>Difference</b>        | <b>Mean</b>   | 0.56         | -0.15        | 1.60         | 2.20         | -3.53         | -1.88       | 0.12         |
|                          | <b>95% CI</b> | -1.09-2.21   | -2.94-2.66   | -0.19-3.39   | -0.96-5.36   | -6.67-0.38    | -5.12-1.37  | -0.87-1.10   |
| <b>p</b>                 |               | NS           | NS           | NS           | NS           | 0.029         | NS          | NS           |

## DISCUSSION

This study provides the first empirical evidence on the use of PROMs for LTCs in primary care focusing on patients with a confirmed diagnosis. The evidence on participation of individuals with LTCs is essential for making decisions about the feasibility of expanding the current PROMs programme to LTCs. The aim of the study was to evaluate the feasibility of collecting PROMs data in LTCs through primary care focusing on response rates to a baseline and follow-up survey conducted one year apart. Overall, a 38.4% response rate was achieved at baseline and 71.5% for the cohort (those responding at baseline and agreeing to be sent a follow-up questionnaire) at follow-up. Response rates varied between LTCs at both assessments. Other factors significantly related to response rates were practice factors (including deprivation score, QOF score and mean EQ-5D score) at baseline, and respondent factors (including age, ethnicity, region and mean baseline EQ-5D score) at follow-up. Other methods to assess feasibility included testing the remote and automatic search of GP databases for eligible patients and to monitor patient exclusions. Problems were encountered with the search. It was possible to overcome these to some extent by the IT company amending the

1  
2  
3  
4  
5  
6  
7 searches. However, discrepancies remained in the number of patients extracted from the search  
8 when compared with QOF estimates. The PROMs programme aims to be as inclusive as possible and  
9 therefore the number of patients excluded by practices at baseline was monitored. The exclusion  
10 rates varied by LTC and by region. The variation by LTC may be related to the nature of the specific  
11 LTC or the comorbidities associated with a particular LTC. The highest exclusion rate was for  
12 epilepsy, which practices reported to be expected as many people with epilepsy have learning  
13 difficulties or other comorbidities which would make it inappropriate for them to be included in the  
14 study. There were no significant changes in EQ-5D scores between baseline and follow-up. The VAS  
15 was significantly different between baseline and follow-up for heart failure only.  
16

17 The main strength of this study is the potential for greater reliability of the diagnosis obtained from  
18 GP clinical systems over the self-reported diagnoses in the GP Patient Survey [143, 154]. While the  
19 study was able to detect patients with LTC using remote and automatic search of GP databases,  
20 weaknesses of the methods tested in this study were the [lack of information about non-responders](#)  
21 [of the baseline survey](#), high exclusion rates by practices in some LTCs and the logistics of remotely  
22 identifying eligible patients from GP databases. [No information about non-responders had been](#)  
23 [collected as there were concerns that collecting these data was too burdensome for participating](#)  
24 [practices. However, such data would have been valuable to assess non-response bias beyond the](#)  
25 [non-response bias from the follow-up. Exclusions rates varied between practices. This was partly due](#)  
26 [to problems with identifying eligible patients in the practices where the search by the IT company](#)  
27 [was first conducted. For example, in the case of epilepsy the initial search did not include the code in](#)  
28 [relation to medication \(as by QOF\) and some practices chose for a member of staff to exclude](#)  
29 [ineligible patients rather than the search being re-run. Some differences in exclusions occurred due](#)  
30 [to practices' different interpretations of the instruction to exclude patients in whom invitation into](#)  
31 [the study would cause serious distress, although this is believed to only have had a minor impact.](#)  
32 [Reasons for exclusions were not recorded systematically \(again to minimize the burden on](#)  
33 [practices\). Practices informally reported that the most commonly reported](#) reasons for exclusion  
34 were comorbidities such as learning difficulties or mental health problems. This suggests that it may  
35 be not be feasible to collect PROMs data from all patients with some diagnoses; other methods,  
36 such as collecting data by proxy, may have to be considered. [Remotely identifying eligible patients](#)  
37 [was challenging due to mistakes made in the initial searches \(search criteria for asthma and epilepsy](#)  
38 [did not meet QOF criteria\) and the search working less well in some of the clinical systems used by](#)  
39 [the participating practices. Furthermore, these problems found in identifying eligible patients from](#)  
40 [the practice databases](#) means that further development work and testing would be necessary to  
41 ensure that such a system was feasible and able to be used across all clinical systems.  
42  
43  
44

45 Response rates were the main variable of interest of this study, and it would be desirable for  
46 response rates, particularly those at baseline, to be higher. However, other general practice-based  
47 surveys such as the GP Patient Survey have achieved a similar response rate [134, 145], suggesting  
48 that such a low response rate would be typical. The advantage of this study is that the potential for  
49 greater reliability of the diagnosis obtained from GP clinical systems over the self-reported diagnoses  
50 in the GP Patient Survey. The response rates for the data collection of the four elective PROMs were  
51 higher (60.3%) than the baseline response rates reported here, as were the response rates post-  
52 surgery (87.5%) [156]. [Nevertheless, non-response bias has been observed in relation to outcomes in](#)  
53 [elective surgery \(Hutchings, 2012 #93\)\[17\].](#) Overall response rates to health surveys are decreasing  
54 [186], but the magnitude of response rates are not always thought to be a problem. Roland and  
55



1  
2  
3  
4  
5  
6  
7 colleagues found little evidence that low response rates and non-response bias in health surveys led  
8 to unfairness in payments for performance in general practices [134]. It is not known whether there  
9 is any non-response bias in this study, and efforts to enhance response rates should not be  
10 dismissed. Traditional methods to increase response rates include a good cover letter and sending a  
11 reminder. More modern methods, however, such as using electronic surveys may help increase  
12 response rates, especially in younger age groups. In this respect, it is worth noting that the response  
13 rate at follow-up of 71.5% suggests that once patients are 'on-board' the study they are likely to  
14 continue to respond, even one year later.  
15

16 The other variables of interest in this study were the EQ-5D mean and VAS scores reported by the  
17 survey respondents, with very little change occurring in health-related quality of life. [Change in the  
18 EQ-5D in LTCS has been considered in the Health Survey for England with little change shown \[19\],  
19 however the cross-sectional design of the Health Survey does not allow for assessment of changes  
20 within the same cohort.](#) In view of the goal of the current policy in England to assess performance of  
21 the health service by means of the EQ-5D, these results raise broader questions about optimal  
22 indicators of care for long-term conditions and appropriate timelines for assessment. Currently there  
23 are a number of major uncertainties regarding trends and timelines for the progression of LTCs.  
24 Moreover, given evidence from this study that better baseline EQ-5D scores resulted in higher  
25 response rates at follow-up, it is unclear how helpful self-reported health-related quality of life is in  
26 monitoring such trends.  
27

28 To improve response rates, the invitation to contribute self-reports of health needs to be more  
29 engaging in the sense of patients perceiving that their reports will actually serve a purpose. This  
30 greater sense of point or purpose could be achieved in three distinct, but not mutually exclusive  
31 ways. Firstly, patients could find the information valuable and informative, for example by providing  
32 feedback of their progress over time or in comparison with other patients. Secondly, patients could  
33 find the information in PROMs helpful in preparing for consultations with healthcare providers or as  
34 a part of regular review or assessment. Thirdly, it is conceivable that patients would value providing  
35 information if it were truly the case that PROMs data were used to provide evidence of quality or  
36 performance of services. The NHS and indeed all other healthcare systems are a long way from being  
37 able to support any of these possible uses of PROMs for long-term conditions that might enhance  
38 patient engagement. Further research needs to address whether PROMs can better inform patients  
39 about their progress, support communication of need or facilitate contributions to quality  
40 assessment.  
41  
42  
43  
44  
45  
46  
47  
48  
49  
50  
51  
52  
53  
54  
55  
56  
57  
58  
59  
60

#### Acknowledgments

We would like to thank the Primary Care Research Networks in London and the North-West; the Diabetes Research Network in London; all the practice staff who helped with the recruitment of practices and patients, and all the patients who participated in the surveys. Furthermore, we would like to thank Mrs Sarah Dummett for her support in collecting the data.

#### Competing interest declaration

All authors have completed the Unified Competing Interest form at [www.icmje.org/coi\\_disclosure.pdf](http://www.icmje.org/coi_disclosure.pdf) (available on request from the corresponding author) and declare that (1) All authors have support from the Department of Health (England) for the submitted work; (2) none of the authors have a relationships with commercial companies that might have an interest in the submitted work in the previous 3 years; (3) their spouses, partners, or children have no relationships that may be relevant to the work; and (4) none of the authors have non-financial interests that may be relevant to the submitted work.

#### Details of contributions

RF, CJ, and HD conceived and designed the study. MP and HC collected data. All authors contributed to the data analysis. MP wrote the article, with contributions from HC, HD, CJ and RF. All authors had access to the data in the study, and can take responsibility for the integrity of the data and the accuracy of the data analysis. All authors edited and approved the final version of the manuscript.

#### Funding and sponsor

This research was initially funded as an individual project under the Department of Health's Policy Research Programme. From 2011, it was incorporated within the research programme of the Department of Health funded Policy Research Unit on Quality and Outcomes of Person Centred Care (QORU), a collaboration between the London School of Economics and Political Science (LSE) and the Universities of Kent and Oxford.

The University of Oxford Clinical Trials and Research Governance (CTRG) acted as sponsor.

#### Disclaimer

This is an independent report commissioned and funded by the Policy Research Programme in the Department of Health. The views expressed are not necessarily those of the Department.

#### Ethics approval

Ethics approval was given by the National Research Ethics (NRES) Committee of the Isle of Wight, Portsmouth & South East Hampshire (now the NRES South-Central Committee) in March 2010 (reference number 10/H0501/10). A change of the diabetes PROM was approved in September 2010.

1  
2  
3  
4  
5  
6  
7 For the baseline, consent was implied by completion and return of the survey. Consent to the follow-  
8 up was given by the majority of baseline participants by providing the research team with contact  
9 details as part of completing the baseline questionnaire.

#### 10 Registration

11  
12 This study was registered on the National Institute for Health Research (NIHR) portfolio in June 2010  
13 (UKCRN ID: 8462).  
14  
15  
16  
17  
18  
19  
20  
21  
22  
23  
24  
25  
26  
27  
28  
29  
30  
31  
32  
33  
34  
35  
36  
37  
38  
39  
40  
41  
42  
43  
44  
45  
46  
47  
48  
49  
50  
51  
52  
53  
54  
55  
56  
57  
58  
59  
60

## REFERENCES

1. Barnett K, Mercer SW, Norbury M, Watt G, Wyke S, Guthrie B. Epidemiology of multimorbidity and implications for health care, research, and medical education: a cross-sectional study. *Lancet* 2012, **380**:37-43
2. Department of Health. Long Term Conditions Compendium of Information. Third ed. London: Department of Health, 2012.
3. Vogeli C, Shields AE, Lee TA, et al. Multiple chronic conditions: prevalence, health consequences, and implications for quality, care management, and costs. *J Gen Intern Med* 2007;**22 Suppl 3**:391-5
4. Pearson WS, Bhat-Schelbert K, Probst JC. Multiple chronic conditions and the aging of America: A challenge for primary care physicians. *Journal of Primary Care and Community Health* 2012;**3**(1):51-56
5. Anderson G, Horvath J. The growing burden of chronic disease in America. *Public Health Rep* 2004;**119**(3):263-70
6. Heyworth IT, Hazell ML, Linehan MF, Frank TL. How do common chronic conditions affect health-related quality of life? *Br J Gen Pract* 2009;**59**(568):e353-8
7. Epping-Jordan JE, Pruitt SD, Bengoa R, Wagner EH. Improving the quality of health care for chronic conditions. *Qual Saf Health Care* 2004;**13**(4):299-305
8. World Health Organization. Innovative care for chronic conditions: building blocks for action. Geneva, 2002.
9. Department of Health. Equity and Excellence: Liberating the NHS. London, 2010.
10. Department of Health. The NHS Outcomes Framework 2012/2013. London, 2011.
11. Black N, Jenkinson C. How can patients' views of their care enhance quality improvement? *BMJ* 2009;**399**:202-05
12. [Department of Health. The NHS Outcomes Framework 2011/2012. London, 2010](#)
13. Rabin R, de Charro F. EQ-5D: a measure of health status from the EuroQol Group. *Ann Med* 2001;**33**(5):337-43
14. Roland M, Elliott M, Lyratzopoulos G, et al. Reliability of patient responses in pay for performance schemes: analysis of national General Practitioner Patient Survey data in England. *BMJ* 2009;**339**:b3851
15. Campbell J, Smith P, Nissen S, Bower P, Elliott M, Roland M. The GP Patient Survey for use in primary care in the National Health Service in the UK--development and psychometric characteristics. *BMC Fam Pract* 2009;**10**:57
16. Browne J, Jamieson L, Lewsey J, et al. Patient reported outcome measures (PROMs) in elective surgery. Report to the Department of Health, 2007.
17. [Hutchings H, Neuburger J, Grosse Frie K, Black n and van der Meulen J. Factors associated with non-response in routine use of patient reported outcome measures after elective surgery in England. Health and Quality of Life Outcomes 2012, 10:34 doi:10.1186/1477-7525-10-34](#)
18. Galea S, Tracy M. Participation rates in epidemiologic studies. *Ann Epidemiol* 2007;**17**(9):643-53
19. [Department of Health. Setting Levels of Ambition for the NHS Outcomes Framework. A technical annex to support Delivering our NHS care objectives: a consultation on the draft mandate](#)

1  
2  
3  
4  
5  
6  
7  
8  
9  
10  
11  
12  
13  
14  
15  
16  
17  
18  
19  
20  
21  
22  
23  
24  
25  
26  
27  
28  
29  
30  
31  
32  
33  
34  
35  
36  
37  
38  
39  
40  
41  
42  
43  
44  
45  
46  
47  
48  
49  
50  
51  
52  
53  
54  
55  
56  
57  
58  
59  
60

[to the NHS Commissioning Board Chapter 4: Enhancing quality of life for people with long-term conditions. London, 2012](#)

For peer review only

1  
2  
3  
4  
5  
6  
7  
8  
9  
10  
11  
12  
13  
14  
15  
16  
17  
18  
19  
20  
21  
22  
23  
24  
25  
26  
27  
28  
29  
30  
31  
32  
33  
34  
35  
36  
37  
38  
39  
40  
41  
42  
43  
44  
45  
46  
47  
48  
49  
50  
51  
52  
53  
54  
55  
56  
57  
58  
59  
60

Figure 1: Recruitment and participation (n) of people with LTCs

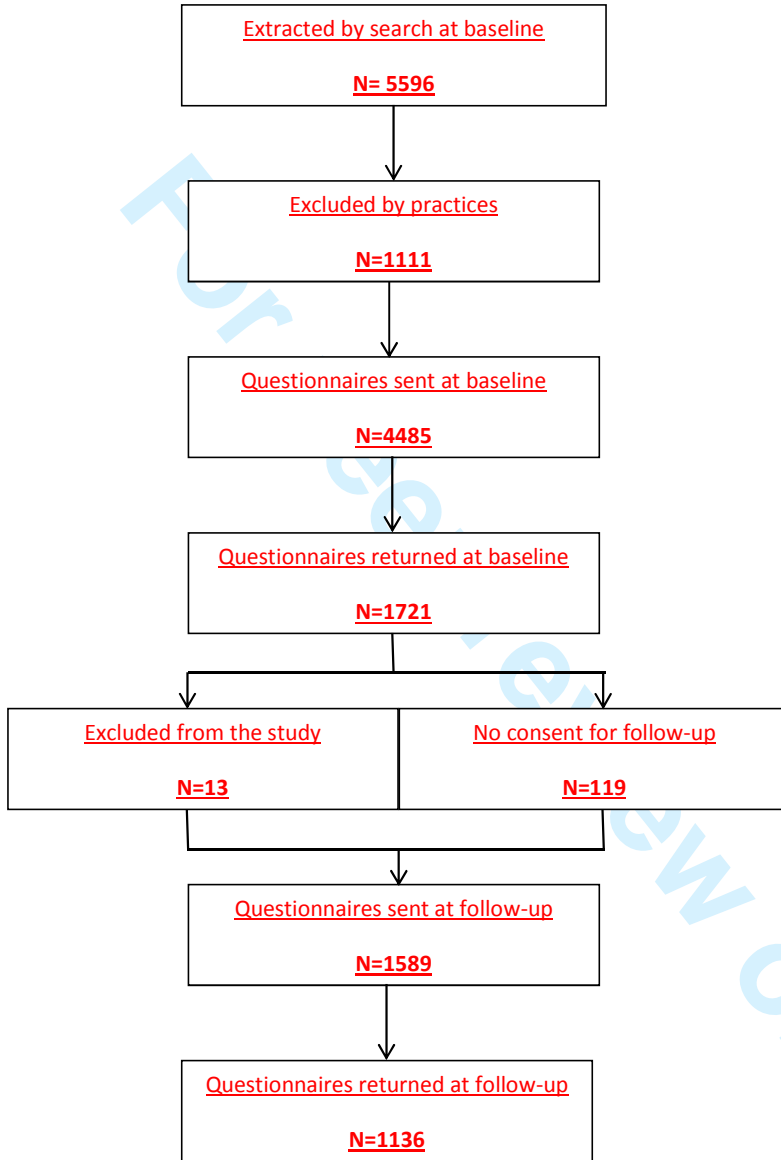

Peters et al. The routine collection of patient reported outcome measures (PROMs) for long-term conditions in primary care: a cohort survey

## STROBE Statement—checklist of items that should be included in reports of observational studies

|                              | Item No | Recommendation                                                                                                                                                                                                                                                                                                                                                                                                                                                         |     |
|------------------------------|---------|------------------------------------------------------------------------------------------------------------------------------------------------------------------------------------------------------------------------------------------------------------------------------------------------------------------------------------------------------------------------------------------------------------------------------------------------------------------------|-----|
| <b>Title and abstract</b>    | 1       | (a) Indicate the study's design with a commonly used term in the title or the abstract                                                                                                                                                                                                                                                                                                                                                                                 | ✓   |
|                              |         | (b) Provide in the abstract an informative and balanced summary of what was done and what was found                                                                                                                                                                                                                                                                                                                                                                    | ✓   |
| <b>Introduction</b>          |         |                                                                                                                                                                                                                                                                                                                                                                                                                                                                        |     |
| Background/rationale         | 2       | Explain the scientific background and rationale for the investigation being reported                                                                                                                                                                                                                                                                                                                                                                                   | ✓   |
| Objectives                   | 3       | State specific objectives, including any prespecified hypotheses                                                                                                                                                                                                                                                                                                                                                                                                       | ✓   |
| <b>Methods</b>               |         |                                                                                                                                                                                                                                                                                                                                                                                                                                                                        |     |
| Study design                 | 4       | Present key elements of study design early in the paper                                                                                                                                                                                                                                                                                                                                                                                                                | ✓   |
| Setting                      | 5       | Describe the setting, locations, and relevant dates, including periods of recruitment, exposure, follow-up, and data collection                                                                                                                                                                                                                                                                                                                                        | ✓   |
| Participants                 | 6       | (a) <i>Cohort study</i> —Give the eligibility criteria, and the sources and methods of selection of participants. Describe methods of follow-up<br><i>Case-control study</i> —Give the eligibility criteria, and the sources and methods of case ascertainment and control selection. Give the rationale for the choice of cases and controls<br><i>Cross-sectional study</i> —Give the eligibility criteria, and the sources and methods of selection of participants | ✓   |
|                              |         | (b) <i>Cohort study</i> —For matched studies, give matching criteria and number of exposed and unexposed<br><i>Case-control study</i> —For matched studies, give matching criteria and the number of controls per case                                                                                                                                                                                                                                                 | N/A |
| Variables                    | 7       | Clearly define all outcomes, exposures, predictors, potential confounders, and effect modifiers. Give diagnostic criteria, if applicable                                                                                                                                                                                                                                                                                                                               | ✓   |
| Data sources/<br>measurement | 8*      | For each variable of interest, give sources of data and details of methods of assessment (measurement). Describe comparability of assessment methods if there is more than one group                                                                                                                                                                                                                                                                                   | ✓   |
| Bias                         | 9       | Describe any efforts to address potential sources of bias                                                                                                                                                                                                                                                                                                                                                                                                              | N/A |
| Study size                   | 10      | Explain how the study size was arrived at                                                                                                                                                                                                                                                                                                                                                                                                                              | ✓   |
| Quantitative variables       | 11      | Explain how quantitative variables were handled in the analyses. If applicable, describe which groupings were chosen and why                                                                                                                                                                                                                                                                                                                                           | ✓   |
| Statistical methods          | 12      | (a) Describe all statistical methods, including those used to control for confounding                                                                                                                                                                                                                                                                                                                                                                                  | ✓   |
|                              |         | (b) Describe any methods used to examine subgroups and interactions                                                                                                                                                                                                                                                                                                                                                                                                    | ✓   |
|                              |         | (c) Explain how missing data were addressed                                                                                                                                                                                                                                                                                                                                                                                                                            | ✓   |
|                              |         | (d) <i>Cohort study</i> —If applicable, explain how loss to follow-up was addressed<br><i>Case-control study</i> —If applicable, explain how matching of cases and controls was addressed<br><i>Cross-sectional study</i> —If applicable, describe analytical methods taking account of sampling strategy                                                                                                                                                              | ✓   |
|                              |         | (e) Describe any sensitivity analyses                                                                                                                                                                                                                                                                                                                                                                                                                                  |     |

Continued on next page

Peters et al. The routine collection of patient reported outcome measures (PROMs) for long-term conditions in primary care: a cohort survey

## Results

|                          |     |                                                                                                                                                                                                              |     |
|--------------------------|-----|--------------------------------------------------------------------------------------------------------------------------------------------------------------------------------------------------------------|-----|
| Participants             | 13* | (a) Report numbers of individuals at each stage of study—eg numbers potentially eligible, examined for eligibility, confirmed eligible, included in the study, completing follow-up, and analysed            | ✓   |
|                          |     | (b) Give reasons for non-participation at each stage                                                                                                                                                         | ✓   |
|                          |     | (c) Consider use of a flow diagram                                                                                                                                                                           |     |
| Descriptive data         | 14* | (a) Give characteristics of study participants (eg demographic, clinical, social) and information on exposures and potential confounders                                                                     | ✓   |
|                          |     | (b) Indicate number of participants with missing data for each variable of interest                                                                                                                          | ✓   |
|                          |     | (c) <i>Cohort study</i> —Summarise follow-up time (eg, average and total amount)                                                                                                                             |     |
| Outcome data             | 15* | <i>Cohort study</i> —Report numbers of outcome events or summary measures over time                                                                                                                          | ✓   |
|                          |     | <i>Case-control study</i> —Report numbers in each exposure category, or summary measures of exposure                                                                                                         |     |
|                          |     | <i>Cross-sectional study</i> —Report numbers of outcome events or summary measures                                                                                                                           |     |
| Main results             | 16  | (a) Give unadjusted estimates and, if applicable, confounder-adjusted estimates and their precision (eg, 95% confidence interval). Make clear which confounders were adjusted for and why they were included | ✓   |
|                          |     | (b) Report category boundaries when continuous variables were categorized                                                                                                                                    |     |
|                          |     | (c) If relevant, consider translating estimates of relative risk into absolute risk for a meaningful time period                                                                                             |     |
| Other analyses           | 17  | Report other analyses done—eg analyses of subgroups and interactions, and sensitivity analyses                                                                                                               | ✓   |
| <b>Discussion</b>        |     |                                                                                                                                                                                                              |     |
| Key results              | 18  | Summarise key results with reference to study objectives                                                                                                                                                     | ✓   |
| Limitations              | 19  | Discuss limitations of the study, taking into account sources of potential bias or imprecision. Discuss both direction and magnitude of any potential bias                                                   | ✓   |
| Interpretation           | 20  | Give a cautious overall interpretation of results considering objectives, limitations, multiplicity of analyses, results from similar studies, and other relevant evidence                                   | ✓   |
| Generalisability         | 21  | Discuss the generalisability (external validity) of the study results                                                                                                                                        | N/A |
| <b>Other information</b> |     |                                                                                                                                                                                                              |     |
| Funding                  | 22  | Give the source of funding and the role of the funders for the present study and, if applicable, for the original study on which the present article is based                                                | ✓   |

\*Give information separately for cases and controls in case-control studies and, if applicable, for exposed and unexposed groups in cohort and cross-sectional studies.

**Note:** An Explanation and Elaboration article discusses each checklist item and gives methodological background and published examples of transparent reporting. The STROBE checklist is best used in conjunction with this article (freely available on the Web sites of PLoS Medicine at <http://www.plosmedicine.org/>, Annals of Internal Medicine at <http://www.annals.org/>, and Epidemiology at <http://www.epidem.com/>). Information on the STROBE Initiative is available at [www.strobe-statement.org](http://www.strobe-statement.org).



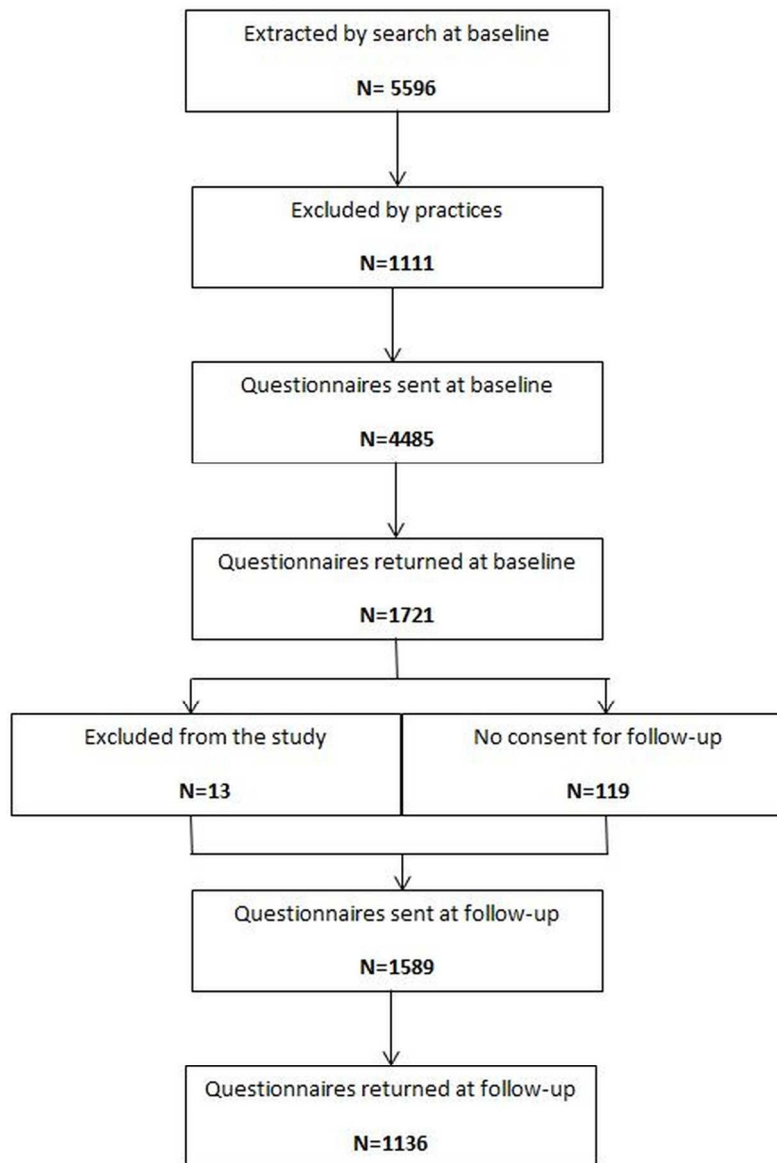

90x124mm (300 x 300 DPI)
